# Supplementary material for: Mitigating SOX2-potentiated Immune Escape of Head and Neck Squamous Cell Carcinoma with a STING-inducing Nanosatellite Vaccine
Source: Oxford University Press journal article supplement (doi:10.1158/1078-0432.ccr-17-2807), 2018-05-16
Supplement: 10780432ccr172807-sup-189624_3_supp_4722629_p7yc0t.xlsx [file 10780432ccr172807-sup-189624_3_supp_4722629_p7yc0t.xlsx]

## Sheet: Figure1E_RNAseq_pvalues_FDRs
	Supplementary Table S1: List of differentially expressed genes in HNSCC cancer cells resistant to immune killing.
	Gene	logFC	LR	PValue	FDR
	C3	-7.67913	345.304	4.46e-77	9.17e-73
	IL8	-6.5115	264.756	1.58e-59	1.62e-55
	INHBA	-6.2274	178.624	9.68e-41	6.63e-37
	LOC153328	6.58521	167.144	3.11e-38	1.6e-34
	ALPPL2	5.13832	161.077	6.58e-37	2.7e-33
	C11orf92	6.06707	154.403	1.89e-35	6.47e-32
	EDAR	4.27699	151.151	9.71e-35	2.85e-31
	COL4A2	-3.57947	140.555	2.01e-32	5.16e-29
	ATP13A5	3.43853	137.543	9.17e-32	2.09e-28
	TFPI2	-3.56062	135.737	2.28e-31	4.68e-28
	SAA1	-7.33379	129.704	4.76e-30	8.88e-27
	CXCL1	-6.13391	113.555	1.63e-26	2.79e-23
	LCN2	-3.5765	111.53	4.53e-26	7.15e-23
	MYOM2	7.6118	103.671	2.39e-24	3.5e-21
	COL4A1	-2.93443	98.1419	3.89e-23	5.33e-20
	HMCN1	2.87776	96.6648	8.21e-23	1.05e-19
	IL32	-2.80004	95.4252	1.54e-22	1.85e-19
	IL1A	-4.31739	94.1639	2.9e-22	3.31e-19
	KLHL24	2.7154	92.0936	8.27e-22	8.93e-19
	SAA2	-8.18454	90.2372	2.11e-21	2.17e-18
	VTCN1	3.29297	89.1089	3.74e-21	3.65e-18
	SAMD11	4.11637	88.6923	4.61e-21	4.3e-18
	GLIPR1	-2.54855	88.6057	4.82e-21	4.3e-18
	FREM2	2.48422	86.4449	1.44e-20	1.23e-17
	PAPPA	-3.34307	85.0906	2.85e-20	2.34e-17
	PALM	4.60969	84.8485	3.22e-20	2.54e-17
	CRYAB	3.93844	84.3724	4.1e-20	3.12e-17
	BCAM	3.3125	81.8576	1.46e-19	1.07e-16
	CDH6	2.50659	81.449	1.8e-19	1.27e-16
	ELF5	3.88265	80.9799	2.28e-19	1.56e-16
	TNF	-5.53585	80.8228	2.47e-19	1.64e-16
	FETUB	8.36728	80.226	3.34e-19	2.14e-16
	DLK2	2.87593	79.8151	4.11e-19	2.56e-16
	ZBTB7C	5.44147	78.2422	9.12e-19	5.5e-16
	MFAP4	3.41665	76.9772	1.73e-18	1.01e-15
	METTL7A	2.86762	76.6689	2.02e-18	1.15e-15
	HS3ST5	3.81729	74.9288	4.88e-18	2.71e-15
	MFSD4	3.89718	74.8287	5.13e-18	2.77e-15
	KRT15	2.63042	74.7636	5.31e-18	2.79e-15
	ZNF436	2.28402	72.3989	1.76e-17	8.86e-15
	TP53INP1	2.67495	72.3853	1.77e-17	8.86e-15
	STON1	3.02541	71.7651	2.42e-17	1.18e-14
	SERPINF1	2.70218	71.506	2.76e-17	1.32e-14
	SPHK1	-2.58474	71.4605	2.83e-17	1.32e-14
	SNRPN	-5.94174	71.2701	3.12e-17	1.37e-14
	IL11	-3.4468	71.2679	3.12e-17	1.37e-14
	PDGFB	-2.92789	71.2596	3.13e-17	1.37e-14
	ALDH1A1	4.70572	70.9339	3.69e-17	1.58e-14
	DOCK4	2.33835	70.899	3.76e-17	1.58e-14
	C15orf48	-4.92884	70.2334	5.27e-17	2.16e-14
	ID2	3.382	69.7626	6.69e-17	2.69e-14
	SEPP1	2.44193	68.8493	1.06e-16	4.2e-14
	CEL	3.14974	68.5284	1.25e-16	4.84e-14
	ZDHHC8P1	4.573	67.8789	1.74e-16	6.61e-14
	SLC4A8	3.41544	67.3896	2.23e-16	8.32e-14
	FBXO32	-3.79763	66.7643	3.06e-16	1.12e-13
	ADAM8	-2.86874	66.5034	3.49e-16	1.26e-13
	TP53INP2	2.5616	65.3478	6.28e-16	2.22e-13
	NEUROG1	9.76378	65.0968	7.13e-16	2.48e-13
	HTRA1	2.46426	64.9681	7.61e-16	2.6e-13
	ITGA5	-2.74396	64.7626	8.45e-16	2.84e-13
	A4GALT	2.39683	64.72	8.63e-16	2.86e-13
	NUPR1	2.20932	64.4604	9.85e-16	3.21e-13
	PRSS12	2.19795	63.6639	1.48e-15	4.73e-13
	KIAA1324	3.51696	63.428	1.66e-15	5.25e-13
	FEZF1	3.04154	63.0725	1.99e-15	6.2e-13
	PDCD4	2.29646	62.8331	2.25e-15	6.89e-13
	SEMA7A	-2.58632	62.6298	2.49e-15	7.53e-13
	TNFSF10	2.67431	62.5692	2.57e-15	7.65e-13
	ZNF703	2.3088	61.6409	4.12e-15	1.21e-12
	BGN	3.23275	60.5721	7.09e-15	2.04e-12
	MXD4	2.13766	60.5524	7.16e-15	2.04e-12
	CHL1	4.88693	60.3799	7.82e-15	2.18e-12
	ARNTL2	-2.56819	60.3681	7.87e-15	2.18e-12
	IL4R	-2.07705	59.6596	1.13e-14	3.09e-12
	IL1B	-5.83706	59.4099	1.28e-14	3.46e-12
	HR	2.55244	59.3588	1.31e-14	3.5e-12
	MPPED2	3.40499	58.8256	1.72e-14	4.53e-12
	MICAL2	-2.18919	58.6554	1.88e-14	4.88e-12
	FAM83A	-3.09741	58.4836	2.05e-14	5.26e-12
	RELB	-2.83546	58.3068	2.24e-14	5.62e-12
	SULT1E1	2.82751	58.306	2.24e-14	5.62e-12
	FOSL1	-2.13313	58.2718	2.28e-14	5.65e-12
	VIPR1	2.05737	58.013	2.6e-14	6.36e-12
	PTPRZ1	2.34174	57.9575	2.68e-14	6.47e-12
	NEBL	2.04419	57.1297	4.08e-14	9.74e-12
	SPOCD1	-3.29507	57.0989	4.14e-14	9.78e-12
	PTGES	-2.72281	57.0613	4.22e-14	9.79e-12
	TMTC1	2.23168	57.0514	4.25e-14	9.79e-12
	COL14A1	2.98864	56.7152	5.04e-14	1.15e-11
	TGFB3	2.3289	56.4097	5.88e-14	1.33e-11
	IL7R	-3.95985	56.2356	6.43e-14	1.43e-11
	CACNA1D	2.8471	55.9727	7.35e-14	1.62e-11
	IPW	-9.77159	55.8868	7.68e-14	1.68e-11
	ALDH3A1	3.97728	55.631	8.74e-14	1.89e-11
	FLNC	-3.14889	55.4454	9.61e-14	2.06e-11
	C2orf89	-4.98051	55.3406	1.01e-13	2.15e-11
	KLHDC8A	5.17158	54.994	1.21e-13	2.53e-11
	PELI2	2.48168	54.8129	1.33e-13	2.75e-11
	COMP	4.53734	54.5902	1.48e-13	3.05e-11
	PPFIBP2	2.7904	54.2065	1.8e-13	3.67e-11
	ETS1	-2.06917	53.5782	2.48e-13	5e-11
	CDA	-2.22862	53.3451	2.8e-13	5.58e-11
	HAS2	-2.87666	53.0883	3.19e-13	6.3e-11
	DLX5	2.17956	52.7303	3.83e-13	7.48e-11
	VAV3	2.19714	52.4928	4.32e-13	8.36e-11
	RPRM	1.96907	52.1961	5.02e-13	9.64e-11
	BEGAIN	1.97249	51.9801	5.61e-13	1.07e-10
	ABCA5	2.45327	51.9254	5.76e-13	1.09e-10
	NT5E	-2.03726	51.7073	6.44e-13	1.2e-10
	G0S2	-2.15353	51.5764	6.89e-13	1.27e-10
	EPHB3	3.10408	51.5553	6.96e-13	1.28e-10
	NOTUM	1.98649	51.3786	7.62e-13	1.38e-10
	LGALS7	2.42431	51.1481	8.57e-13	1.54e-10
	SYDE2	2.26157	50.9685	9.39e-13	1.68e-10
	ASAP3	1.90672	50.8075	1.02e-12	1.8e-10
	S100A4	2.03108	50.6786	1.09e-12	1.91e-10
	HSD17B3	3.04356	50.5767	1.15e-12	1.99e-10
	VCAN	-1.94603	50.4519	1.22e-12	2.11e-10
	UPP1	-2.13499	50.1854	1.4e-12	2.39e-10
	MAP2	2.02871	50.0513	1.5e-12	2.54e-10
	CYP26A1	1.80658	48.2875	3.68e-12	6.18e-10
	CHST11	-1.94197	48.2746	3.71e-12	6.18e-10
	C7orf58	2.67808	48.1758	3.9e-12	6.45e-10
	FBN1	-2.06767	48.1087	4.03e-12	6.62e-10
	COL1A1	-4.65247	48.031	4.2e-12	6.84e-10
	RRAD	-3.99393	47.9386	4.4e-12	7.11e-10
	GBP1	-1.84425	47.7169	4.92e-12	7.9e-10
	PLAUR	-2.38709	47.5353	5.4e-12	8.6e-10
	TRAF1	-3.39947	47.2927	6.11e-12	9.66e-10
	DBP	3.06953	47.2079	6.38e-12	1e-09
	TTC28	1.85757	47.1257	6.66e-12	1.04e-09
	CLDN19	3.77468	46.9984	7.1e-12	1.1e-09
	COL9A3	2.33434	46.6928	8.3e-12	1.27e-09
	TSC22D3	1.80961	46.5168	9.08e-12	1.38e-09
	LCK	-3.48562	46.4727	9.29e-12	1.4e-09
	POLR2J3	3.04981	46.1618	1.09e-11	1.63e-09
	COL21A1	1.90458	46.0852	1.13e-11	1.68e-09
	ZBED2	-3.05561	46.0014	1.18e-11	1.75e-09
	ID3	2.2422	45.6945	1.38e-11	2.03e-09
	TNFAIP3	-2.37726	45.2868	1.7e-11	2.48e-09
	BIN1	-2.32432	44.7887	2.19e-11	3.17e-09
	SIGLEC11	5.25635	44.7535	2.23e-11	3.2e-09
	TRPV2	-1.79127	44.7431	2.25e-11	3.2e-09
	IFITM2	2.19992	44.7072	2.29e-11	3.24e-09
	NELL2	1.9756	44.3224	2.79e-11	3.92e-09
	NR3C2	3.44909	44.2032	2.96e-11	4.13e-09
	GPRC5B	1.95346	44.016	3.26e-11	4.52e-09
	LPHN3	2.02818	43.9372	3.39e-11	4.67e-09
	GPR110	-2.56813	43.9028	3.45e-11	4.72e-09
	PPIF	-1.95616	43.572	4.09e-11	5.56e-09
	SIGLEC16	6.47529	43.3246	4.64e-11	6.26e-09
	SQRDL	-2.45665	43.2641	4.78e-11	6.42e-09
	NCRNA00086	4.22327	43.2385	4.85e-11	6.46e-09
	NFKB2	-2.01108	43.0505	5.33e-11	7.07e-09
	GABRG1	2.78415	42.6615	6.51e-11	8.57e-09
	LMO4	1.78578	42.6111	6.68e-11	8.72e-09
	ID1	2.63846	42.6019	6.71e-11	8.72e-09
	KLF9	2.99371	42.5469	6.9e-11	8.91e-09
	PRKX	1.79208	42.3584	7.6e-11	9.75e-09
	UACA	1.85303	42.2785	7.92e-11	1.01e-08
	CNGB1	-5.77937	42.2586	8e-11	1.01e-08
	CMAH	3.95226	42.0961	8.69e-11	1.09e-08
	FRY	2.54242	42.0268	9e-11	1.13e-08
	AFAP1L2	-1.73425	41.9165	9.53e-11	1.19e-08
	ST6GALNAC2	2.01271	41.3989	1.24e-10	1.54e-08
	LGR5	2.47698	41.3375	1.28e-10	1.57e-08
	TG	3.97487	41.0789	1.46e-10	1.79e-08
	ANXA3	-1.74695	40.8664	1.63e-10	1.98e-08
	DYSF	-2.98548	40.7669	1.72e-10	2.07e-08
	CXCL3	-4.24648	40.7153	1.76e-10	2.11e-08
	S1PR1	-2.80419	40.7005	1.77e-10	2.12e-08
	TNFRSF9	-4.72616	40.6646	1.81e-10	2.14e-08
	ELFN1	2.65265	40.5846	1.88e-10	2.22e-08
	ZC3H12A	-1.76916	40.4559	2.01e-10	2.36e-08
	CTSF	2.43883	40.384	2.09e-10	2.43e-08
	COL4A5	1.79049	40.0101	2.53e-10	2.93e-08
	IGFBP7	2.33833	39.7039	2.96e-10	3.41e-08
	ICAM4	2.09929	39.6514	3.04e-10	3.48e-08
	SESN3	1.73565	39.561	3.18e-10	3.63e-08
	LIX1	5.0738	39.3065	3.62e-10	4.11e-08
	SCD5	1.6969	39.2608	3.71e-10	4.18e-08
	CAPN2	-1.88154	39.1574	3.91e-10	4.39e-08
	CYP2W1	2.32551	39.1229	3.98e-10	4.44e-08
	STEAP1	-1.84176	39.0705	4.09e-10	4.54e-08
	ARHGAP20	4.18917	38.9934	4.25e-10	4.69e-08
	FYB	-2.85996	38.3937	5.78e-10	6.35e-08
	BCL6	1.78791	38.0979	6.73e-10	7.35e-08
	COL4A4	2.3701	38.0404	6.93e-10	7.53e-08
	JMY	1.75349	37.8907	7.48e-10	8.09e-08
	TCEA3	1.83999	37.868	7.57e-10	8.14e-08
	HERPUD1	1.78126	37.8086	7.8e-10	8.34e-08
	UPK3BL	2.54216	37.6924	8.28e-10	8.81e-08
	PHYHD1	-6.86668	37.6592	8.42e-10	8.92e-08
	SNTA1	1.94373	37.4126	9.56e-10	1.01e-07
	RAB26	3.18885	37.1232	1.11e-09	1.16e-07
	NCAM2	3.28965	36.8986	1.24e-09	1.3e-07
	BMF	1.80637	36.8123	1.3e-09	1.35e-07
	APOD	2.72423	36.7968	1.31e-09	1.35e-07
	HGF	3.83407	36.7398	1.35e-09	1.39e-07
	PROS1	2.49081	36.6782	1.39e-09	1.42e-07
	ASAM	-2.49755	36.5529	1.49e-09	1.51e-07
	F3	-1.94567	36.4763	1.55e-09	1.56e-07
	CA2	-1.8399	36.4042	1.6e-09	1.61e-07
	LTB	-4.57346	36.2904	1.7e-09	1.7e-07
	AGPAT9	-1.98022	36.2492	1.74e-09	1.73e-07
	PLEK2	-1.64382	36.2139	1.77e-09	1.75e-07
	FAM108B1	1.5777	36.0026	1.97e-09	1.95e-07
	NES	-1.85115	35.9743	2e-09	1.96e-07
	INPP5J	2.27427	35.9591	2.02e-09	1.96e-07
	AMY2B	3.33146	35.9591	2.02e-09	1.96e-07
	WNT10B	-3.00034	35.9297	2.05e-09	1.98e-07
	CSF2	-4.84571	35.8758	2.1e-09	2.03e-07
	STC1	-3.74649	35.7738	2.22e-09	2.12e-07
	CALCOCO1	1.69692	35.7692	2.22e-09	2.12e-07
	ACADSB	1.91958	35.7579	2.23e-09	2.12e-07
	DENND2A	-8.31991	35.2038	2.97e-09	2.81e-07
	FOXQ1	2.0046	35.1679	3.02e-09	2.85e-07
	SLC26A7	3.34886	35.1482	3.06e-09	2.86e-07
	SLC25A29	1.55992	34.9878	3.32e-09	3.1e-07
	CDH12	2.42596	34.9209	3.43e-09	3.19e-07
	NEURL3	-5.89861	34.8972	3.48e-09	3.21e-07
	ISG15	-1.65379	34.8407	3.58e-09	3.29e-07
	ARID5B	1.63392	34.8158	3.62e-09	3.32e-07
	KCTD12	2.14704	34.8007	3.65e-09	3.33e-07
	ARHGEF37	2.42605	34.6855	3.88e-09	3.52e-07
	HEY1	2.64425	34.5601	4.13e-09	3.74e-07
	PECI	-2.31767	34.4862	4.29e-09	3.87e-07
	GLIPR2	-2.24711	34.3491	4.61e-09	4.13e-07
	CCL5	-4.00239	34.1942	4.99e-09	4.45e-07
	TRIM16L	-1.66649	34.0438	5.39e-09	4.79e-07
	SSC5D	2.72689	33.9951	5.53e-09	4.89e-07
	NFATC1	2.0971	33.9501	5.65e-09	4.97e-07
	HEY2	2.80981	33.9441	5.67e-09	4.97e-07
	KAL1	2.08294	33.9375	5.69e-09	4.97e-07
	GPR37	1.64413	33.8959	5.81e-09	5.06e-07
	ANXA8L2	-1.61458	33.642	6.62e-09	5.74e-07
	CXCR7	1.54635	33.546	6.96e-09	6e-07
	CACHD1	1.92989	33.5341	7e-09	6.02e-07
	ZNF362	1.53204	33.4856	7.18e-09	6.14e-07
	EPHA5	2.58178	33.4767	7.21e-09	6.14e-07
	NAALAD2	2.56229	33.4584	7.28e-09	6.18e-07
	SLC2A6	-2.95187	33.4269	7.4e-09	6.25e-07
	MRC2	1.55165	33.3254	7.8e-09	6.56e-07
	TIMP4	-3.01534	33.301	7.89e-09	6.62e-07
	NRIP3	-1.74461	33.2753	8e-09	6.68e-07
	MUC20	1.7474	33.1835	8.39e-09	6.97e-07
	CST6	-2.34689	33.1082	8.72e-09	7.22e-07
	CKMT1B	2.0895	33.0691	8.89e-09	7.33e-07
	HBEGF	-1.9476	32.9923	9.25e-09	7.6e-07
	CABLES1	1.75082	32.9162	9.62e-09	7.87e-07
	ADH7	5.8119	32.8483	9.96e-09	8.12e-07
	NPDC1	1.70579	32.8122	1.02e-08	8.24e-07
	WNT6	3.20186	32.7519	1.05e-08	8.46e-07
	NFIX	1.58909	32.7393	1.05e-08	8.49e-07
	DLX3	4.1612	32.6303	1.11e-08	8.94e-07
	IL6	-3.70804	32.6081	1.13e-08	9.01e-07
	ANKRD35	2.76836	32.5883	1.14e-08	9.06e-07
	FAM65B	3.74267	32.57	1.15e-08	9.11e-07
	GSTA4	3.32111	32.3278	1.3e-08	1.03e-06
	CBFA2T2	1.50729	32.1877	1.4e-08	1.1e-06
	DEPDC6	3.36128	32.1556	1.42e-08	1.12e-06
	TMCC2	1.94816	32.1483	1.43e-08	1.12e-06
	IL27RA	-1.9532	32.0957	1.47e-08	1.14e-06
	DAPL1	3.68826	32.0771	1.48e-08	1.15e-06
	PAN2	1.53934	32.0677	1.49e-08	1.15e-06
	FAM189A2	3.10416	32.0362	1.51e-08	1.16e-06
	HEPHL1	-3.18169	31.741	1.76e-08	1.35e-06
	GREB1L	6.08282	31.6429	1.85e-08	1.41e-06
	CRIP2	1.65558	31.4971	2e-08	1.52e-06
	HMGA2	-1.80555	31.4564	2.04e-08	1.55e-06
	NIPSNAP3A	1.4903	31.4416	2.06e-08	1.55e-06
	PTPRU	1.76553	31.3468	2.16e-08	1.62e-06
	LAMA4	2.41056	31.3427	2.16e-08	1.62e-06
	APOL4	4.05305	31.2682	2.25e-08	1.68e-06
	ATOH8	5.00499	31.2112	2.31e-08	1.72e-06
	ANKH	1.97899	31.1942	2.33e-08	1.73e-06
	PNRC1	1.70452	31.0909	2.46e-08	1.82e-06
	VIT	3.08877	30.886	2.74e-08	2.01e-06
	SMAD6	1.78732	30.7838	2.88e-08	2.11e-06
	PAPLN	1.81171	30.7403	2.95e-08	2.16e-06
	BDKRB2	-7.80113	30.7205	2.98e-08	2.17e-06
	C8orf84	2.63493	30.7017	3.01e-08	2.18e-06
	MT1X	2.69663	30.6651	3.07e-08	2.22e-06
	BOC	1.99015	30.6575	3.08e-08	2.22e-06
	OSMR	-1.6096	30.6279	3.13e-08	2.24e-06
	GYLTL1B	1.45612	30.5557	3.24e-08	2.32e-06
	GATSL1	-7.7991	30.2336	3.83e-08	2.73e-06
	ACTG2	-2.27732	30.2081	3.88e-08	2.76e-06
	FBLN1	2.22037	30.1368	4.03e-08	2.85e-06
	KCNN1	3.31279	30.0333	4.25e-08	3e-06
	MMP13	-1.76248	30.0248	4.27e-08	3e-06
	MSLN	1.6502	30.009	4.3e-08	3.01e-06
	CDC42EP4	1.46411	30.0033	4.31e-08	3.01e-06
	DUSP5	-2.3096	29.9512	4.43e-08	3.08e-06
	CD68	-2.39537	29.9232	4.5e-08	3.12e-06
	MMP20	6.55831	29.8345	4.71e-08	3.25e-06
	SPSB4	3.67306	29.7225	4.99e-08	3.43e-06
	PBX1	1.77557	29.659	5.15e-08	3.54e-06
	SPOCK3	2.75823	29.5921	5.33e-08	3.64e-06
	SEMA3E	1.50896	29.5887	5.34e-08	3.64e-06
	ZNF681	-7.90503	29.3969	5.9e-08	4.01e-06
	MYH16	-3.25628	29.3794	5.95e-08	4.03e-06
	EIF3C	-1.46284	29.2947	6.22e-08	4.2e-06
	ICAM5	2.21453	29.2626	6.32e-08	4.25e-06
	LBH	1.54716	29.216	6.47e-08	4.34e-06
	FRZB	4.04632	29.2096	6.5e-08	4.34e-06
	JAKMIP2	2.22272	29.1835	6.58e-08	4.39e-06
	EPHA3	2.05993	29.1575	6.67e-08	4.43e-06
	DYNC1I1	2.14527	29.0971	6.88e-08	4.56e-06
	COL8A2	-1.50589	29.08	6.95e-08	4.58e-06
	B3GNT3	-1.71763	28.9321	7.5e-08	4.92e-06
	NAV3	-3.27579	28.929	7.51e-08	4.92e-06
	POF1B	1.42195	28.8621	7.77e-08	5.08e-06
	NCAM1	5.029	28.7948	8.05e-08	5.24e-06
	OLR1	-4.54242	28.7158	8.38e-08	5.45e-06
	ASB2	-8.39359	28.707	8.42e-08	5.45e-06
	NRG1	-1.85796	28.638	8.73e-08	5.63e-06
	HBP1	1.44244	28.4756	9.49e-08	6.11e-06
	CRLF1	3.09733	28.4616	9.56e-08	6.13e-06
	KMO	-4.35351	28.3779	9.98e-08	6.38e-06
	SRPX	-2.32032	28.3654	1e-07	6.4e-06
	FRAT2	1.64959	28.2713	1.05e-07	6.69e-06
	BOP1	-1.47	28.2697	1.06e-07	6.69e-06
	FAM70B	-6.53181	28.1845	1.1e-07	6.97e-06
	THRA	1.62817	28.1784	1.11e-07	6.97e-06
	FSTL3	-1.61325	28.1543	1.12e-07	7.03e-06
	MSC	-2.28888	28.1426	1.13e-07	7.05e-06
	TNNT3	2.87041	27.9676	1.23e-07	7.7e-06
	ZNF711	1.41406	27.8712	1.3e-07	8.07e-06
	HAP1	2.13529	27.8618	1.3e-07	8.08e-06
	BZRAP1	2.25282	27.8543	1.31e-07	8.09e-06
	ZNF85	-3.97902	27.8377	1.32e-07	8.13e-06
	GATS	1.9328	27.7197	1.4e-07	8.62e-06
	IGFBP6	-2.13141	27.6268	1.47e-07	9.02e-06
	NEXN	-2.10988	27.5934	1.5e-07	9.15e-06
	PBXIP1	1.37168	27.587	1.5e-07	9.15e-06
	POPDC3	-1.99361	27.2815	1.76e-07	1.07e-05
	ATP13A4	2.64216	27.2027	1.83e-07	1.11e-05
	NFE2L3	-2.04785	27.1741	1.86e-07	1.12e-05
	NKX3-2	3.87997	27.1073	1.92e-07	1.16e-05
	PIK3CD	-2.08189	27.0611	1.97e-07	1.18e-05
	SERPINB9	-2.14678	27.0082	2.03e-07	1.21e-05
	EPHA7	1.84093	26.9904	2.04e-07	1.22e-05
	MAFA	3.08486	26.9883	2.05e-07	1.22e-05
	CDH18	3.57798	26.9783	2.06e-07	1.22e-05
	ADORA1	3.38308	26.969	2.07e-07	1.22e-05
	SNORD116-4	-6.64258	26.9468	2.09e-07	1.23e-05
	BCL11A	1.51557	26.9162	2.12e-07	1.25e-05
	KCP	1.52126	26.8962	2.15e-07	1.26e-05
	CRISPLD1	1.4147	26.8338	2.22e-07	1.3e-05
	CHN2	2.79309	26.826	2.23e-07	1.3e-05
	SLC39A8	-1.53637	26.8047	2.25e-07	1.31e-05
	LAMB2	1.75282	26.7178	2.35e-07	1.37e-05
	COL4A6	1.42485	26.7075	2.37e-07	1.37e-05
	SAMD5	2.04149	26.7061	2.37e-07	1.37e-05
	FAM83E	3.11803	26.6998	2.38e-07	1.37e-05
	TRIM45	1.68209	26.6861	2.39e-07	1.37e-05
	CITED4	1.37822	26.6258	2.47e-07	1.41e-05
	EBI3	-4.37228	26.6218	2.47e-07	1.41e-05
	C1S	1.6412	26.5567	2.56e-07	1.46e-05
	CPE	1.64961	26.4186	2.75e-07	1.56e-05
	CDCP1	-1.3965	26.3139	2.9e-07	1.64e-05
	B3GNT2	1.35746	26.3103	2.91e-07	1.64e-05
	C20orf108	1.39342	26.2805	2.95e-07	1.66e-05
	TMCC3	-2.21845	26.227	3.04e-07	1.7e-05
	AHCYL2	1.67496	26.2004	3.08e-07	1.72e-05
	MAP3K5	1.39829	26.1796	3.11e-07	1.74e-05
	MEIS2	1.53767	26.1534	3.15e-07	1.75e-05
	EMG1	-1.42091	26.082	3.27e-07	1.82e-05
	LUM	-2.26173	26.0717	3.29e-07	1.82e-05
	MTSS1L	1.5782	26.0387	3.35e-07	1.85e-05
	IGDCC4	-4.16287	25.956	3.49e-07	1.92e-05
	CGB5	-7.85854	25.9426	3.52e-07	1.93e-05
	SCGB1A1	7.18934	25.8402	3.71e-07	2.03e-05
	C14orf4	1.34323	25.8159	3.76e-07	2.05e-05
	SYT8	1.90373	25.8099	3.77e-07	2.05e-05
	CAMK2N1	1.70867	25.7457	3.9e-07	2.12e-05
	TUBB2A	-1.43076	25.52	4.38e-07	2.37e-05
	HLF	2.36117	25.4914	4.44e-07	2.4e-05
	CARD11	-5.9934	25.4626	4.51e-07	2.43e-05
	ABCG2	-3.59141	25.4302	4.59e-07	2.47e-05
	LHX1	-3.83808	25.4224	4.61e-07	2.47e-05
	PRRX1	2.12671	25.4028	4.65e-07	2.49e-05
	SOX6	2.5729	25.3426	4.8e-07	2.56e-05
	SACS	-1.31557	25.3362	4.82e-07	2.56e-05
	AZGP1	-3.55068	25.2068	5.15e-07	2.73e-05
	HEG1	1.35365	25.2024	5.16e-07	2.73e-05
	A2M	4.0389	25.1669	5.26e-07	2.77e-05
	DLX2	1.75995	25.114	5.4e-07	2.84e-05
	DKK1	-1.49685	25.0942	5.46e-07	2.86e-05
	PKIB	-2.07748	25.0939	5.46e-07	2.86e-05
	RCSD1	1.42481	25.0903	5.47e-07	2.86e-05
	C3orf57	2.91339	25.0852	5.49e-07	2.86e-05
	EMP3	-3.15084	25.0761	5.51e-07	2.86e-05
	CSF3	-7.45213	25.0067	5.71e-07	2.96e-05
	LAMC3	-6.34957	24.8849	6.09e-07	3.14e-05
	CD99	-1.67988	24.8846	6.09e-07	3.14e-05
	C13orf15	1.85239	24.7996	6.36e-07	3.27e-05
	SUSD4	4.72232	24.7792	6.43e-07	3.3e-05
	ANXA4	1.35826	24.7729	6.45e-07	3.3e-05
	IGFN1	-4.65451	24.6478	6.88e-07	3.51e-05
	ADA	-3.65915	24.5236	7.34e-07	3.73e-05
	PGM5	3.40608	24.5223	7.35e-07	3.73e-05
	JDP2	1.71786	24.2945	8.27e-07	4.19e-05
	CASZ1	1.30598	24.274	8.36e-07	4.23e-05
	BIRC3	-3.01076	24.2488	8.47e-07	4.27e-05
	TCP11L2	2.05181	24.1802	8.77e-07	4.41e-05
	CDKN2C	1.48638	24.1652	8.84e-07	4.44e-05
	LAPTM5	-4.26554	23.9366	9.96e-07	4.99e-05
	CYP1A1	1.43545	23.9039	1.01e-06	5.06e-05
	TBC1D3G	6.91503	23.8354	1.05e-06	5.22e-05
	CNTN1	1.31228	23.8334	1.05e-06	5.22e-05
	PCDHB5	-4.29926	23.8164	1.06e-06	5.26e-05
	C6orf58	-6.0107	23.766	1.09e-06	5.38e-05
	STXBP5L	3.5226	23.75	1.1e-06	5.41e-05
	ANXA8	-1.66067	23.7231	1.11e-06	5.48e-05
	MTSS1	-1.36457	23.7068	1.12e-06	5.5e-05
	PRLR	-3.80371	23.7061	1.12e-06	5.5e-05
	DAPP1	-1.59268	23.6385	1.16e-06	5.68e-05
	DDR2	1.27721	23.5074	1.24e-06	6.06e-05
	LRRC7	1.74667	23.5065	1.24e-06	6.06e-05
	SH2D5	-3.00485	23.4663	1.27e-06	6.16e-05
	CD22	1.59984	23.4604	1.28e-06	6.16e-05
	RNF152	2.3976	23.4595	1.28e-06	6.16e-05
	PCMTD2	1.26352	23.4433	1.29e-06	6.2e-05
	NTN4	1.3992	23.429	1.3e-06	6.23e-05
	CSDC2	1.5691	23.3376	1.36e-06	6.52e-05
	COL3A1	4.83946	23.3018	1.38e-06	6.63e-05
	IGFBP2	1.61707	23.2547	1.42e-06	6.78e-05
	SLC47A2	2.85772	23.2491	1.42e-06	6.78e-05
	SLC16A5	1.67473	23.2282	1.44e-06	6.84e-05
	MYO1B	-1.50478	23.1893	1.47e-06	6.96e-05
	NR2F1	1.75461	23.1809	1.47e-06	6.98e-05
	KITLG	1.34725	23.1637	1.49e-06	7.02e-05
	CD83	-2.1116	23.1558	1.49e-06	7.03e-05
	SLC43A3	-1.29238	23.0891	1.55e-06	7.27e-05
	TMEM92	-5.49171	23.0348	1.59e-06	7.46e-05
	PPIP5K1	1.24933	23.031	1.59e-06	7.46e-05
	PTPN13	1.41009	23.0018	1.62e-06	7.55e-05
	OSTalpha	3.38301	22.9401	1.67e-06	7.78e-05
	ESRRG	2.55389	22.8159	1.78e-06	8.28e-05
	SYTL1	1.49573	22.8096	1.79e-06	8.29e-05
	KSR1	-1.5739	22.7617	1.83e-06	8.48e-05
	ELN	2.6188	22.6834	1.91e-06	8.81e-05
	SPARC	2.17264	22.6568	1.94e-06	8.92e-05
	ADAM19	-1.83137	22.6427	1.95e-06	8.96e-05
	EREG	-1.88502	22.5093	2.09e-06	9.58e-05
	ST6GALNAC1	2.66012	22.493	2.11e-06	9.64e-05
	TWIST1	-5.88649	22.4826	2.12e-06	9.67e-05
	GIMAP6	-5.30833	22.3833	2.23e-06	0.000101657
	EFCAB4A	1.53976	22.3707	2.25e-06	0.0001021
	CXCL10	-6.13223	22.3074	2.32e-06	0.000105289
	AATF	-1.30503	22.3014	2.33e-06	0.000105384
	RORB	3.39697	22.2631	2.38e-06	0.000107162
	DOCK8	2.05207	22.2609	2.38e-06	0.000107162
	OCIAD2	-1.48912	22.2512	2.39e-06	0.000107466
	ITGA10	1.8124	22.2458	2.4e-06	0.000107532
	COL6A1	3.29939	22.2153	2.44e-06	0.000108861
	DNAH14	-7.17227	22.2139	2.44e-06	0.000108861
	NFKBIL2	-1.22956	22.2089	2.45e-06	0.000108906
	D4S234E	2.25692	22.1963	2.46e-06	0.000109389
	PTPN22	-3.33625	22.0798	2.62e-06	0.000115981
	LOC440173	-5.87263	22.0203	2.7e-06	0.000119258
	PTHLH	-1.59711	22.018	2.7e-06	0.000119258
	ZNF502	-7.09753	22.007	2.72e-06	0.000119552
	MYH14	1.26184	22.0051	2.72e-06	0.000119552
	MCM10	-1.27801	21.9852	2.75e-06	0.000120375
	CLDN3	3.37405	21.9837	2.75e-06	0.000120375
	ABCA2	2.01893	21.9675	2.77e-06	0.000121068
	SOX7	-1.79902	21.9645	2.78e-06	0.000121068
	COL15A1	-4.31416	21.9128	2.85e-06	0.000124108
	FAM78B	6.67504	21.7823	3.05e-06	0.000132564
	SLC16A9	-1.54178	21.7626	3.09e-06	0.000133651
	H19	3.06733	21.7274	3.14e-06	0.000135835
	FSCN1	-1.83213	21.6987	3.19e-06	0.000137599
	LIMS2	-2.20807	21.6872	3.21e-06	0.000137848
	ICAM2	-3.0114	21.6871	3.21e-06	0.000137848
	EMB	1.27525	21.6341	3.3e-06	0.000141418
	SPP1	-1.96502	21.5317	3.48e-06	0.000148859
	CTNND2	1.73454	21.4746	3.59e-06	0.000153038
	PLSCR4	1.8857	21.4402	3.65e-06	0.000155486
	RHBDF2	-1.28723	21.3965	3.73e-06	0.000158744
	TAP2	-1.26566	21.3557	3.81e-06	0.000161508
	PDLIM2	1.73507	21.3555	3.82e-06	0.000161508
	TP53TG1	1.41902	21.3255	3.88e-06	0.00016372
	ENG	-1.43264	21.3167	3.89e-06	0.000164134
	POU2AF1	2.97001	21.2867	3.95e-06	0.000166381
	YPEL3	1.8557	21.2457	4.04e-06	0.000169627
	DFNB31	1.44027	21.2344	4.06e-06	0.00017028
	ARHGDIB	-1.76096	21.2263	4.08e-06	0.000170653
	ICAM1	-1.60915	21.1842	4.17e-06	0.000173926
	PRR5L	1.53161	21.1821	4.18e-06	0.000173926
	MUC15	2.34756	21.1523	4.24e-06	0.000176301
	TRIM16	-1.25501	21.1455	4.26e-06	0.000176563
	GPR172B	2.32318	21.1288	4.29e-06	0.00017775
	CCNG2	1.27217	21.0908	4.38e-06	0.000180949
	LOC284578	5.10671	21.0354	4.51e-06	0.000185883
	PALMD	1.56564	20.9879	4.62e-06	0.000190167
	SLC44A4	1.84465	20.9707	4.66e-06	0.000191496
	LYN	-1.49876	20.921	4.79e-06	0.000196134
	SCPEP1	1.22487	20.9008	4.84e-06	0.000197822
	GGT6	1.27322	20.8727	4.91e-06	0.000200345
	RRP12	-1.1657	20.8681	4.92e-06	0.000200426
	CCIN	-4.77337	20.8077	5.08e-06	0.000206444
	HSH2D	-3.50682	20.7438	5.25e-06	0.000213026
	PROCR	-1.36313	20.7253	5.3e-06	0.000214671
	RGPD8	-6.88031	20.6546	5.5e-06	0.000222307
	EMR1	-7.17378	20.6171	5.61e-06	0.000226252
	SOS2	1.17866	20.6062	5.64e-06	0.000227069
	PITPNM3	1.55871	20.6027	5.65e-06	0.000227069
	F2RL1	-1.2192	20.5848	5.7e-06	0.000228753
	PIK3IP1	1.80605	20.5576	5.79e-06	0.000231222
	CLTB	-1.20847	20.5568	5.79e-06	0.000231222
	PPAN-P2RY11	6.70414	20.5369	5.85e-06	0.000233193
	LSP1	1.69036	20.5175	5.91e-06	0.000235102
	CADM1	1.48397	20.4703	6.06e-06	0.000240515
	COTL1	-1.5242	20.4385	6.16e-06	0.000244054
	HS3ST6	2.71173	20.4349	6.17e-06	0.000244054
	NFKBIA	-1.61578	20.3934	6.3e-06	0.00024892
	SIGLEC15	-3.70886	20.359	6.42e-06	0.000252956
	C11orf93	2.59628	20.3211	6.55e-06	0.000257525
	AKR1C1	1.916	20.2932	6.64e-06	0.000260522
	GPR172A	-1.21897	20.2916	6.65e-06	0.000260522
	ABL2	-1.31714	20.2747	6.71e-06	0.000262334
	KCNH4	3.17945	20.2602	6.76e-06	0.000263825
	IFI44	-1.8811	20.2459	6.81e-06	0.000265303
	NDST4	4.22081	20.2122	6.93e-06	0.000269506
	CILP	4.72882	20.1598	7.12e-06	0.00027647
	SEMA3F	1.25281	20.1519	7.15e-06	0.000276801
	SOX15	-1.25827	20.1485	7.17e-06	0.000276801
	FOXN3	1.2321	20.1467	7.17e-06	0.000276801
	RRP9	-1.31447	20.1022	7.34e-06	0.000282553
	CCDC85A	2.82366	20.1002	7.35e-06	0.000282553
	KCNS1	-2.82259	20.0873	7.4e-06	0.000283923
	LY6K	-1.59489	20.066	7.48e-06	0.000286358
	KCNN3	-4.47762	20.0618	7.5e-06	0.000286358
	CD3D	-5.23243	20.0603	7.5e-06	0.000286358
	FLG	-1.37909	20.0378	7.59e-06	0.000289028
	FAM105A	1.40154	20.0355	7.6e-06	0.000289028
	RALGPS1	1.90149	19.9788	7.83e-06	0.000297164
	LPGAT1	1.31295	19.971	7.86e-06	0.000297829
	LAMC2	-2.21564	19.9631	7.89e-06	0.00029851
	IL12RB1	-5.23617	19.8999	8.16e-06	0.000307983
	SREBF1	1.57024	19.8464	8.39e-06	0.000315488
	PLEKHM1P	1.58075	19.8449	8.4e-06	0.000315488
	BMP5	2.15824	19.8434	8.41e-06	0.000315488
	ANGPT1	4.19045	19.8339	8.45e-06	0.000315923
	VNN1	-5.68371	19.8337	8.45e-06	0.000315923
	CPZ	-2.17491	19.8261	8.48e-06	0.000316621
	FA2H	2.50207	19.8191	8.51e-06	0.000317197
	C1orf21	1.21245	19.8032	8.58e-06	0.000319271
	PLEKHA1	1.5141	19.786	8.66e-06	0.000321571
	EHD4	-1.14299	19.7615	8.77e-06	0.000325126
	C3orf58	1.21672	19.7559	8.8e-06	0.00032549
	PSMD13	-1.23467	19.7497	8.83e-06	0.000325972
	GUCY1A3	1.53775	19.7105	9.01e-06	0.000332121
	SCNN1A	1.30321	19.6919	9.1e-06	0.000334771
	APCDD1	4.40191	19.6534	9.28e-06	0.00034098
	SULF1	1.75293	19.6293	9.4e-06	0.00034469
	LRRC26	3.40181	19.5771	9.66e-06	0.000353604
	FILIP1L	-4.59191	19.566	9.72e-06	0.000355024
	DDIT4	1.57437	19.5143	9.99e-06	0.000364131
	TOM1L2	1.29362	19.5093	1e-05	0.000364432
	CLSPN	-1.32787	19.4979	1.01e-05	0.000365961
	TRIL	2.24062	19.4552	1.03e-05	0.000373578
	RNF144B	1.1364	19.3799	1.07e-05	0.000387639
	ARID3B	-1.47129	19.3779	1.07e-05	0.000387639
	RSAD2	-4.52509	19.3525	1.09e-05	0.000392126
	RDH10	1.22922	19.3173	1.11e-05	0.00039873
	DIXDC1	1.46036	19.3129	1.11e-05	0.000398948
	MXI1	1.35417	19.2607	1.14e-05	0.000409295
	C4orf34	1.76148	19.2363	1.15e-05	0.000413821
	BNIPL	3.23677	19.2254	1.16e-05	0.000415476
	NBL1	-1.25568	19.1746	1.19e-05	0.000425946
	ADAMTS1	-1.36999	19.1661	1.2e-05	0.000427087
	TBX1	2.0677	19.1614	1.2e-05	0.000427415
	ALDH7A1	1.25114	19.1569	1.2e-05	0.000427677
	KCNE1	7.08983	19.1047	1.24e-05	0.000438385
	GATSL2	2.47684	19.1031	1.24e-05	0.000438385
	CD97	-1.21225	19.0615	1.27e-05	0.000447274
	PAR-SN	-6.59497	19.0146	1.3e-05	0.000457621
	TRIM2	1.57343	19.001	1.31e-05	0.000460105
	MT1G	2.12243	18.9176	1.36e-05	0.000479826
	MLXIPL	1.96451	18.8737	1.4e-05	0.000490156
	IRAK2	-2.08757	18.8501	1.41e-05	0.000495147
	TMEM171	-2.12192	18.8479	1.42e-05	0.000495147
	LY6D	-1.36853	18.8405	1.42e-05	0.000496233
	SOAT1	-1.38856	18.8365	1.42e-05	0.000496428
	SLC28A3	-5.06516	18.7957	1.45e-05	0.000506298
	HTRA3	-2.89787	18.784	1.46e-05	0.000508546
	FAM83C	-1.32423	18.7265	1.51e-05	0.000523232
	NFIA	1.15553	18.7199	1.51e-05	0.000524174
	CACYBP	-1.15287	18.7128	1.52e-05	0.000525235
	ADORA2B	-1.20014	18.7059	1.53e-05	0.000526262
	SOBP	2.19537	18.7017	1.53e-05	0.000526536
	SASH1	1.16504	18.6765	1.55e-05	0.000532633
	C6orf150	-1.40507	18.6411	1.58e-05	0.000541701
	MYH15	-2.92109	18.6297	1.59e-05	0.000544057
	SAA4	-6.72885	18.6163	1.6e-05	0.000546984
	EGFL6	3.59094	18.5978	1.61e-05	0.000551386
	SGCZ	4.48221	18.5429	1.66e-05	0.000566565
	B4GALNT1	-1.73417	18.5253	1.68e-05	0.000570866
	HIST1H1C	1.22001	18.5126	1.69e-05	0.000573719
	SOD2	-1.60498	18.4895	1.71e-05	0.000579767
	GRB10	-1.27704	18.4784	1.72e-05	0.00058218
	TMEM156	-4.17623	18.4607	1.73e-05	0.000586641
	ZC3H6	2.25965	18.4272	1.77e-05	0.00059562
	NOX5	2.32966	18.4255	1.77e-05	0.00059562
	ICK	1.24953	18.4102	1.78e-05	0.000599441
	LAMA1	1.5519	18.3911	1.8e-05	0.00060448
	ID4	3.68846	18.3826	1.81e-05	0.000606189
	REEP2	2.47954	18.3645	1.82e-05	0.000611
	MYO7B	-4.11578	18.3569	1.83e-05	0.000612437
	HAPLN1	6.18297	18.3458	1.84e-05	0.000615003
	UBXN10	-6.2894	18.307	1.88e-05	0.000626248
	ISYNA1	1.2663	18.3051	1.88e-05	0.000626248
	NR2E1	2.4403	18.3002	1.89e-05	0.000626844
	IL1R2	-6.64854	18.2928	1.89e-05	0.000627644
	SERTAD4	1.26652	18.2906	1.9e-05	0.000627644
	ODZ4	1.08736	18.2886	1.9e-05	0.000627644
	YBX2	2.70217	18.2776	1.91e-05	0.00063026
	GSTA3	3.73373	18.2602	1.93e-05	0.000635004
	SOX2	1.27541	18.2265	1.96e-05	0.000645301
	DSCC1	-1.37722	18.2122	1.98e-05	0.000649154
	TLL2	-3.25771	18.2071	1.98e-05	0.000649821
	PLAU	-2.06745	18.167	2.02e-05	0.000662617
	OASL	-2.47252	18.138	2.05e-05	0.000671688
	TRIP13	-1.36164	18.1292	2.06e-05	0.000673755
	DUOX1	1.22421	18.1207	2.07e-05	0.000675693
	DPP4	-2.09448	18.0676	2.13e-05	0.0006937
	TIAM2	-1.2757	18.0393	2.16e-05	0.000702962
	YPEL5	1.09628	17.998	2.21e-05	0.000717242
	GPM6A	2.24728	17.9725	2.24e-05	0.000725762
	APOE	1.80571	17.9156	2.31e-05	0.000746624
	EXO1	-1.20276	17.8729	2.36e-05	0.000762341
	AKAP12	-1.21045	17.8675	2.37e-05	0.000763344
	MCCC1	1.10491	17.8305	2.41e-05	0.000777072
	CIITA	-4.79016	17.8128	2.44e-05	0.000783118
	LRP3	1.1825	17.7975	2.46e-05	0.000788209
	PER3	1.25652	17.7826	2.48e-05	0.000793182
	DIRAS2	5.13705	17.7444	2.53e-05	0.000807996
	BMP7	1.72383	17.7365	2.54e-05	0.000810111
	TTLL3	2.06399	17.7264	2.55e-05	0.000813138
	CCNE2	-1.56558	17.7185	2.56e-05	0.000815247
	ZPLD1	-5.17024	17.7111	2.57e-05	0.000817164
	MX2	-5.75777	17.6762	2.62e-05	0.000831028
	HPGD	1.54515	17.6685	2.63e-05	0.000833099
	PEAR1	-2.68339	17.6621	2.64e-05	0.00083462
	SLC6A9	1.09156	17.6533	2.65e-05	0.000837185
	TSTD1	1.64161	17.6412	2.67e-05	0.000840344
	PRKAB2	1.13324	17.6396	2.67e-05	0.000840344
	SBK1	2.01066	17.6374	2.67e-05	0.000840344
	WNT11	2.71742	17.6331	2.68e-05	0.000840953
	RASSF4	-3.33629	17.6114	2.71e-05	0.000849312
	TP73	2.17677	17.6067	2.72e-05	0.000850143
	ARSI	-2.80808	17.5949	2.73e-05	0.000854114
	GNG7	3.096	17.5568	2.79e-05	0.000870075
	XDH	-1.61473	17.5273	2.83e-05	0.0008819
	GLIS1	-5.70811	17.5254	2.83e-05	0.0008819
	CLEC18B	2.77523	17.5162	2.85e-05	0.000884826
	CES3	2.21174	17.5133	2.85e-05	0.000884826
	NOXA1	2.52405	17.5039	2.87e-05	0.000887871
	TPM1	-1.4128	17.4948	2.88e-05	0.000890816
	FKBP4	-1.29812	17.448	2.95e-05	0.000911643
	SFTA1P	-4.29072	17.4365	2.97e-05	0.000915638
	BCL7A	1.81829	17.4339	2.97e-05	0.000915638
	ZFAND2A	-1.8764	17.3952	3.04e-05	0.000933092
	ABCB1	2.15604	17.3857	3.05e-05	0.000936342
	KIAA1217	1.11898	17.3595	3.09e-05	0.000946773
	P2RX5	-1.08662	17.359	3.09e-05	0.000946773
	DCBLD2	-1.34468	17.3235	3.15e-05	0.00096322
	GJA1	1.55718	17.2866	3.21e-05	0.000980649
	KIAA0020	-1.08287	17.2827	3.22e-05	0.000981185
	SLC23A1	3.27873	17.2635	3.25e-05	0.000989663
	AMIGO2	-1.13957	17.2525	3.27e-05	0.000993938
	NOTCH4	-2.9115	17.218	3.33e-05	0.00101067
	CNST	1.10121	17.1866	3.39e-05	0.00102601
	KISS1	-3.1094	17.1295	3.49e-05	0.00105576
	TMSB10	-1.3718	17.0831	3.58e-05	0.00108029
	RHOD	-1.29448	17.0598	3.62e-05	0.001092
	ZNF580	1.47643	17.0202	3.7e-05	0.00111336
	EFHD2	-1.16807	17.0054	3.73e-05	0.00111983
	CKB	1.07171	17.0037	3.73e-05	0.00111983
	FOXO4	1.63166	16.9524	3.83e-05	0.00114879
	SMS	-1.09166	16.9234	3.89e-05	0.00116481
	NYNRIN	-2.50515	16.8727	4e-05	0.00119456
	EPB41L4B	1.14557	16.8655	4.01e-05	0.00119648
	HSPH1	-1.36846	16.8642	4.02e-05	0.00119648
	RCAN1	1.25627	16.854	4.04e-05	0.00120113
	GCGR	3.07382	16.795	4.16e-05	0.0012368
	LCP1	-1.51263	16.793	4.17e-05	0.0012368
	POU3F2	2.23498	16.7836	4.19e-05	0.00124117
	GALNT3	-1.13777	16.7746	4.21e-05	0.00124515
	TOX2	1.16447	16.772	4.21e-05	0.00124515
	PRR15	1.45004	16.7642	4.23e-05	0.00124851
	CADM4	1.17069	16.756	4.25e-05	0.00125213
	GGT1	-1.40206	16.743	4.28e-05	0.00125894
	PPARA	1.24664	16.736	4.3e-05	0.00126177
	WIPI1	1.36799	16.725	4.32e-05	0.00126728
	SEC31B	2.54769	16.7084	4.36e-05	0.0012766
	SELPLG	-3.77928	16.7035	4.37e-05	0.00127768
	TMEM106B	1.07047	16.7014	4.37e-05	0.00127768
	BCAR1	-1.18608	16.6986	4.38e-05	0.00127776
	KLK12	3.63597	16.6566	4.48e-05	0.00130432
	EBF3	2.15537	16.6542	4.49e-05	0.00130432
	PKMYT1	-1.23312	16.6086	4.59e-05	0.00133416
	ANK3	1.13902	16.5985	4.62e-05	0.00133939
	TNIP1	-1.14828	16.583	4.66e-05	0.00134846
	PRIC285	-1.08958	16.5555	4.72e-05	0.00136623
	NEAT1	1.8266	16.5152	4.83e-05	0.00139361
	MRPS24	-1.30919	16.4863	4.9e-05	0.001413
	RNF157	3.17271	16.4708	4.94e-05	0.00142262
	KCND3	4.45022	16.4396	5.02e-05	0.00144422
	ALPP	2.28652	16.4329	5.04e-05	0.00144728
	PLCB4	2.08494	16.4213	5.07e-05	0.00145411
	CDC45	-1.14869	16.4091	5.1e-05	0.00146151
	TRAPPC6A	2.41937	16.4063	5.11e-05	0.00146162
	WNT16	2.44038	16.3771	5.19e-05	0.00148226
	RUNX1T1	3.70957	16.3623	5.23e-05	0.00149182
	DLL1	1.45413	16.3577	5.24e-05	0.0014933
	CCDC114	3.98921	16.3513	5.26e-05	0.00149628
	EPB49	1.05435	16.3432	5.28e-05	0.0015
	SELE	-6.23799	16.3414	5.29e-05	0.0015
	HDAC5	1.08182	16.3216	5.35e-05	0.00151368
	KCNQ5	1.22665	16.308	5.38e-05	0.00152248
	TSG1	5.89913	16.2793	5.47e-05	0.00154259
	PLA2G6	1.72988	16.2779	5.47e-05	0.00154259
	UFD1L	-1.04001	16.2636	5.51e-05	0.00155217
	RALGDS	1.15907	16.2459	5.56e-05	0.0015646
	DIRAS1	1.71476	16.231	5.61e-05	0.00157445
	CLU	-1.06988	16.2267	5.62e-05	0.00157445
	PDZK1IP1	-4.00642	16.2262	5.62e-05	0.00157445
	BCKDHA	1.0924	16.2166	5.65e-05	0.00158026
	SYBU	1.15419	16.2102	5.67e-05	0.0015835
	MAP1B	-1.32134	16.1968	5.71e-05	0.00159258
	FN1	-2.6413	16.1903	5.73e-05	0.00159586
	TUSC1	3.65522	16.1658	5.8e-05	0.00161443
	SFRP5	-6.34724	16.1439	5.87e-05	0.00162945
	SCN1A	4.09454	16.1432	5.87e-05	0.00162945
	AEN	-1.06716	16.121	5.94e-05	0.00164526
	KCNJ8	2.54859	16.1198	5.95e-05	0.00164526
	MAMDC2	-2.46319	16.0972	6.02e-05	0.00166272
	NACAD	-2.06376	16.0821	6.07e-05	0.00167379
	GTF2IRD2B	1.86629	16.0416	6.2e-05	0.00170767
	NCF2	-1.71922	15.9996	6.34e-05	0.00174361
	FCGRT	1.31114	15.9934	6.36e-05	0.00174704
	MEF2C	1.65867	15.9797	6.4e-05	0.00175534
	SH2D4A	-1.19381	15.9793	6.4e-05	0.00175534
	STRC	4.5406	15.9619	6.46e-05	0.00176927
	SLC9A4	4.35533	15.9456	6.52e-05	0.00178211
	TSTA3	-1.17608	15.9299	6.57e-05	0.00179458
	TMEM129	1.05247	15.9172	6.62e-05	0.00180288
	AFAP1L1	-1.45166	15.9162	6.62e-05	0.00180288
	CDCA5	-1.23496	15.8843	6.73e-05	0.00183106
	PFN2	1.16083	15.8795	6.75e-05	0.00183332
	TBC1D9	1.03405	15.7929	7.07e-05	0.00191415
	FGF1	-3.18875	15.7928	7.07e-05	0.00191415
	SLC7A2	1.0723	15.7521	7.22e-05	0.00195318
	EHD3	1.02666	15.7445	7.25e-05	0.00195846
	HSPB3	2.68244	15.7314	7.3e-05	0.00196957
	ATP6V1B1	2.80666	15.7203	7.34e-05	0.00197849
	MMP10	1.40724	15.6989	7.43e-05	0.00199841
	THBS4	1.70977	15.6874	7.47e-05	0.00200796
	GPR153	-1.48447	15.6229	7.73e-05	0.00207486
	EBF4	2.32441	15.6109	7.78e-05	0.00208536
	FXYD3	1.44016	15.5918	7.86e-05	0.00210382
	AK1	-1.06449	15.5889	7.87e-05	0.00210432
	CYP2D6	4.67603	15.5856	7.89e-05	0.00210522
	TRPM2	-1.05101	15.5785	7.91e-05	0.00211042
	PKLR	-5.16171	15.5723	7.94e-05	0.00211459
	LOC647859	6.05371	15.5629	7.98e-05	0.00212236
	PRSS27	1.75146	15.5423	8.07e-05	0.0021429
	TSPAN15	-1.03206	15.5298	8.12e-05	0.00215429
	CNR1	4.71057	15.5176	8.17e-05	0.0021654
	ENPP3	-6.8287	15.5046	8.23e-05	0.00217755
	PI15	2.85044	15.468	8.39e-05	0.00221728
	KRT4	5.43952	15.4624	8.42e-05	0.00222107
	RAB40B	1.57805	15.4235	8.59e-05	0.00226347
	EPHA6	2.01096	15.4218	8.6e-05	0.00226347
	SYNE1	1.32695	15.4129	8.64e-05	0.00227123
	PRKCDBP	-1.89417	15.4081	8.66e-05	0.00227409
	CACNA1H	-1.94517	15.3961	8.72e-05	0.00228562
	HRK	2.68176	15.3896	8.75e-05	0.00229055
	DOCK2	1.92828	15.3861	8.76e-05	0.00229188
	MICALCL	-2.25447	15.3766	8.81e-05	0.00230056
	KCNJ2	2.07878	15.366	8.86e-05	0.00231048
	ALDH6A1	1.44225	15.3503	8.93e-05	0.00232688
	HSPE1	-1.04098	15.3277	9.04e-05	0.0023519
	EFCAB4B	-1.53813	15.317	9.09e-05	0.00236228
	UBD	-4.53338	15.2424	9.46e-05	0.00245422
	ADAMTS6	-2.25361	15.2305	9.52e-05	0.00246666
	CXCL5	-5.7617	15.2202	9.57e-05	0.00247709
	AHSA1	-1.07384	15.1739	9.8e-05	0.00253527
	ABP1	-3.85307	15.1439	9.96e-05	0.00257037
	ALDH5A1	1.29314	15.1402	9.98e-05	0.00257037
	NCF1C	-4.65832	15.1395	9.98e-05	0.00257037
	IL1F9	-3.03518	15.1385	9.99e-05	0.00257037
	APBB2	1.07053	15.1226	0.000100749	0.00258884
	RALB	-1.01608	15.1191	0.000100939	0.00259047
	VEGFC	-1.22406	15.1157	0.000101117	0.00259181
	RHBDL1	2.01603	15.1126	0.000101283	0.00259283
	ATIC	-1.11529	15.1101	0.00010142	0.0025931
	LEF1	1.11949	15.1052	0.000101683	0.0025966
	CNN1	-3.37185	15.0875	0.00010264	0.00261778
	THOC4	-1.0729	15.0824	0.000102919	0.00262163
	BAG2	-1.11882	15.0639	0.000103934	0.0026442
	RHOF	-1.34461	15.0601	0.00010414	0.00264451
	KLK8	1.4838	15.059	0.000104204	0.00264451
	NIPSNAP3B	3.17966	14.9758	0.0001089	0.00276028
	RPS6KA4	-1.05317	14.9647	0.000109539	0.00277305
	GJA5	5.94886	14.9607	0.000109773	0.00277556
	FMO5	2.58791	14.9262	0.0001118	0.00282015
	TCOF1	-1.14685	14.926	0.000111812	0.00282015
	SLC22A3	-1.42335	14.9231	0.000111982	0.00282099
	ANXA10	-4.76127	14.9139	0.00011253	0.00283132
	PLAC2	1.9595	14.9084	0.000112858	0.0028361
	GLT25D2	2.24158	14.9009	0.000113308	0.00284392
	MYCL1	1.94977	14.8843	0.000114312	0.00286562
	IKBKE	-1.63231	14.8751	0.000114867	0.00287602
	AREG	-1.57332	14.8339	0.000117407	0.00293256
	PNCK	3.40129	14.8338	0.000117411	0.00293256
	CDC25A	-1.15061	14.8312	0.000117573	0.00293304
	PNOC	3.13315	14.8171	0.000118459	0.00295154
	RASL10B	-1.35698	14.805	0.000119221	0.00296694
	NBEA	1.09613	14.7886	0.000120259	0.00298914
	EYA2	0.998796	14.7836	0.000120579	0.00299348
	FAM82A1	1.54501	14.7681	0.000121578	0.00301462
	THBS2	-1.40638	14.7129	0.000125187	0.00310038
	SPAST	0.986351	14.7073	0.000125556	0.00310578
	CYP4B1	4.27558	14.6119	0.000132078	0.00326317
	GRIN3A	2.13927	14.6054	0.000132538	0.00327059
	B4GALNT4	1.19519	14.6014	0.000132815	0.0032735
	MRGPRF	-2.71589	14.5941	0.000133329	0.00328224
	LYAR	-0.996554	14.5915	0.000133518	0.00328295
	SHANK3	-1.1549	14.5882	0.000133748	0.00328467
	PLD1	1.01498	14.5809	0.000134268	0.0032935
	C11orf52	1.81253	14.5751	0.000134684	0.00329768
	C7orf50	-1.25872	14.5723	0.000134885	0.00329768
	FRAS1	1.02565	14.5712	0.00013496	0.00329768
	PSMD14	-1.0103	14.5695	0.000135081	0.00329768
	RBL2	1.01337	14.5638	0.000135494	0.00330383
	DPP9	-1.01162	14.5243	0.000138363	0.00336795
	IP6K3	3.81099	14.5231	0.000138452	0.00336795
	PVRL4	1.29726	14.5103	0.000139393	0.00338683
	VSIG8	3.53267	14.4923	0.000140732	0.00341532
	MEX3B	1.88658	14.4897	0.000140931	0.00341612
	C8orf46	-3.55924	14.486	0.000141204	0.0034187
	MLC1	4.07471	14.4601	0.000143157	0.00345818
	PLEKHH3	1.09339	14.459	0.000143247	0.00345818
	PRR15L	3.207	14.4577	0.00014334	0.00345818
	MGC14436	-2.56263	14.4457	0.000144257	0.00347297
	NFKB1	-1.0669	14.4453	0.000144291	0.00347297
	LOC146880	1.52852	14.4416	0.000144575	0.00347573
	PCSK5	0.987671	14.4326	0.000145265	0.00348822
	LDLRAD1	3.03166	14.4264	0.000145748	0.00349573
	PROC	1.44989	14.4053	0.000147384	0.00353084
	PSMC3	-0.98234	14.3722	0.00015	0.00358932
	CSAG3	3.95797	14.3679	0.000150344	0.00359337
	COL18A1	1.26781	14.3523	0.000151593	0.00361901
	KIF26A	1.13244	14.3299	0.000153405	0.00365803
	TGFB2	-1.63925	14.2978	0.000156045	0.00371667
	MGC87042	-1.69192	14.266	0.000158703	0.00377558
	HKDC1	-1.12033	14.2616	0.000159075	0.00378005
	LOC100216001	-2.89948	14.2588	0.000159317	0.00378143
	VGLL2	-2.88937	14.2402	0.000160897	0.00381453
	GNAZ	2.62346	14.2355	0.000161295	0.00381954
	DEFB4A	-5.80095	14.2326	0.000161546	0.00382103
	KDM4A	1.06615	14.2285	0.000161903	0.00382103
	ADAMTS13	3.14314	14.2283	0.000161916	0.00382103
	SVOPL	3.86805	14.1913	0.000165129	0.00389238
	IFI44L	-2.16965	14.1812	0.000166025	0.00390901
	EIF2C2	-0.980191	14.1663	0.000167338	0.0039343
	SERPINE1	-2.04255	14.1647	0.000167482	0.0039343
	DOK5	2.44723	14.1467	0.000169096	0.00396766
	SATB1	1.06262	14.1304	0.000170562	0.00399751
	DBNL	-1.02796	14.1231	0.000171231	0.0040086
	PPP1R1B	2.42305	14.1034	0.00017303	0.00404611
	SLC25A32	-0.981996	14.0973	0.000173594	0.00405096
	PRDM12	-4.07726	14.0969	0.000173632	0.00405096
	EFHD1	1.53522	14.0944	0.000173858	0.00405162
	WBP1	1.05673	14.082	0.000175009	0.00407381
	HLA-G	-2.62358	14.0579	0.000177271	0.0041218
	LHX3	1.56112	14.0506	0.000177957	0.00413307
	C9orf30	-1.02382	14.041	0.000178865	0.00414718
	HES7	-2.18001	14.0381	0.000179147	0.00414718
	CAPN9	2.63518	14.0378	0.00017917	0.00414718
	POMP	-0.967457	14.0299	0.00017993	0.00415837
	PDCD5	-1.03156	14.0285	0.000180059	0.00415837
	CCL20	-5.81395	14.0169	0.000181171	0.00417934
	PTPRE	-1.26452	14.0063	0.000182197	0.0041983
	PSMD11	-1.05392	14.0039	0.000182427	0.00419889
	ENGASE	1.21115	13.997	0.000183106	0.00420981
	LIF	-1.3052	13.9821	0.000184556	0.00423838
	SERPINB4	-5.09885	13.9709	0.000185658	0.00425894
	TRAF3	-1.06746	13.9571	0.000187031	0.00428563
	CREG2	-1.70399	13.9485	0.000187889	0.00430051
	C16orf57	-1.03521	13.9368	0.000189062	0.00432252
	NTF4	1.98197	13.8883	0.000194002	0.00443055
	SLCO4C1	5.59357	13.8749	0.00019539	0.00445728
	CSMD1	5.61734	13.8633	0.000196603	0.00447997
	GIPC2	3.85008	13.8544	0.000197536	0.00449624
	DNAJC4	1.29125	13.8491	0.000198093	0.00450394
	MYLK	-0.987702	13.8449	0.000198539	0.00450908
	MAGI2	1.69084	13.841	0.000198952	0.00451346
	NTS	4.42916	13.8372	0.00019935	0.00451749
	TUBB3	-1.17979	13.8193	0.000201257	0.00455568
	RAPGEFL1	1.43434	13.8057	0.000202717	0.00458367
	QSOX1	-1.03308	13.7899	0.000204427	0.00461726
	TMEM22	-1.53148	13.7744	0.000206127	0.00465053
	NMUR2	2.57692	13.7466	0.000209198	0.00471464
	MGST1	-1.00832	13.7112	0.000213176	0.00479903
	RPL13A	1.33295	13.696	0.000214916	0.00483247
	DNMT3A	1.4236	13.6941	0.000215132	0.00483247
	HS6ST1	1.11279	13.6899	0.000215616	0.00483585
	C9orf167	-1.03903	13.6887	0.000215754	0.00483585
	ZNF467	1.53706	13.6853	0.000216139	0.00483921
	MSTO2P	1.74825	13.671	0.00021779	0.00487086
	HAS3	-1.13371	13.6678	0.000218159	0.00487379
	CD69	-3.49219	13.6492	0.00022033	0.00490886
	ACCS	1.91017	13.6484	0.000220432	0.00490886
	AXL	-1.07977	13.6483	0.000220446	0.00490886
	CDC42BPG	0.984395	13.6423	0.000221147	0.00491915
	TCF7	-1.7663	13.6326	0.000222288	0.00493917
	SOD1	-0.974721	13.6256	0.000223125	0.00495241
	STOX1	2.01439	13.5759	0.000229103	0.0050796
	SOX9	-1.19581	13.5633	0.000230654	0.00510847
	TM4SF19	-2.14247	13.5585	0.000231238	0.00511589
	GPR17	-3.20382	13.5527	0.000231962	0.00512638
	ROS1	-3.39633	13.5453	0.000232872	0.00514096
	C17orf44	2.22596	13.4763	0.000241597	0.00532785
	ABCA13	-1.48743	13.4484	0.000245213	0.00540178
	PSMD6	-0.939195	13.4224	0.000248636	0.00547132
	ETV5	0.977467	13.4075	0.000250619	0.00550906
	ADH1C	3.31273	13.4044	0.000251037	0.00551233
	EPB41L1	0.993035	13.3967	0.00025207	0.00552613
	TNIK	-0.963009	13.3957	0.000252203	0.00552613
	ABCC6	2.22091	13.3931	0.000252556	0.00552795
	ANPEP	-2.02406	13.3911	0.000252827	0.005528
	FDX1	1.01403	13.3874	0.000253318	0.00553285
	LPPR1	4.00626	13.3807	0.000254225	0.00554675
	C10orf99	4.25807	13.353	0.000258007	0.00562328
	SARM1	1.26737	13.3466	0.000258892	0.0056366
	CPLX3	4.08008	13.3319	0.000260933	0.00567358
	RIN1	-0.969664	13.3304	0.000261143	0.00567358
	SECTM1	1.57346	13.3229	0.000262183	0.00569014
	LIMK2	1.03288	13.3101	0.000263979	0.00572309
	ATAD3B	-0.965138	13.2892	0.000266942	0.00578001
	DLK1	5.50714	13.2876	0.000267168	0.00578001
	LOC339535	1.58078	13.2823	0.000267917	0.00578572
	FGFBP2	3.2659	13.2818	0.000267995	0.00578572
	FRAT1	2.29225	13.2764	0.000268766	0.00579626
	RAB3B	1.68243	13.2722	0.00026937	0.00580319
	ITGB6	-1.0196	13.2615	0.000270912	0.00582428
	OGDHL	2.42993	13.2615	0.000270916	0.00582428
	MZF1	1.31457	13.2536	0.000272063	0.0058428
	SURF2	-1.09957	13.2474	0.000272965	0.00585604
	TDRD5	-4.32516	13.2359	0.000274639	0.00588581
	NFKBIZ	-1.16309	13.2008	0.000279826	0.00599073
	ACSS2	0.954317	13.1779	0.000283268	0.00605512
	BTBD3	0.965728	13.1769	0.000283424	0.00605512
	PGM2L1	1.2943	13.1146	0.000293009	0.00625339
	CENPW	-1.35641	13.1071	0.000294185	0.00627197
	KIFC3	-1.16982	13.1044	0.000294596	0.00627422
	IFFO1	-4.53253	13.0988	0.000295485	0.00628663
	FOLR1	1.95461	13.0906	0.000296778	0.00630761
	ASL	-1.0549	13.0769	0.000298954	0.00634728
	HLA-DRB6	3.32092	13.0739	0.000299438	0.00635098
	ROGDI	1.18642	13.0664	0.000300634	0.00636979
	CSRP2	-1.33324	13.0605	0.000301581	0.00637578
	BRCA2	-1.1339	13.06	0.000301668	0.00637578
	KIAA0802	1.03672	13.0589	0.000301849	0.00637578
	GBP2	-1.36057	13.0553	0.000302428	0.00638146
	SNRPA1	-1.08051	13.0529	0.000302816	0.00638261
	TLN2	0.973427	13.0477	0.00030365	0.00638261
	CREB3L4	1.2999	13.0473	0.000303723	0.00638261
	ATP6V1C2	1.25335	13.0473	0.000303727	0.00638261
	CCDC57	1.06023	13.0216	0.000307914	0.00646398
	RHOBTB3	1.16878	13.017	0.000308676	0.00647335
	MID2	1.14762	13.0151	0.00030899	0.00647335
	CLDN6	-2.30014	12.9675	0.000316948	0.00663328
	SPRY2	1.01857	12.9602	0.000318189	0.00665248
	PSMB3	-0.975391	12.958	0.000318553	0.00665331
	HSD17B2	-3.10537	12.9388	0.000321835	0.00671158
	SSTR5	-3.54661	12.9379	0.000321996	0.00671158
	C1QTNF1	1.38451	12.9336	0.00032273	0.00672006
	FAM167A	-3.16931	12.927	0.000323883	0.00673722
	PDCD1LG2	-2.65497	12.9247	0.000324269	0.00673843
	PRDM6	2.46076	12.9214	0.00032485	0.00674367
	BIRC7	-2.45713	12.9074	0.000327292	0.00678288
	CKAP2L	-1.14447	12.9067	0.0003274	0.00678288
	RARB	1.26897	12.8958	0.000329322	0.00680907
	CLCF1	-1.49239	12.8958	0.000329327	0.00680907
	TMEM132B	2.89077	12.8927	0.000329868	0.0068134
	RIPK3	-4.50635	12.8803	0.000332064	0.00685186
	RYR1	1.10361	12.8758	0.000332863	0.00686146
	CCNL2	1.15169	12.869	0.000334069	0.0068794
	PTRF	-1.10586	12.8665	0.000334514	0.00688167
	CD274	-2.26262	12.8576	0.000336115	0.00690768
	NOP2	-0.966948	12.852	0.000337121	0.00692143
	LIPG	-1.40475	12.8381	0.000339628	0.00696594
	CDC6	-0.97491	12.8267	0.000341713	0.00700022
	LGALS1	-1.08267	12.8252	0.000341981	0.00700022
	SSBP2	1.53444	12.8195	0.000343029	0.00700922
	SLC43A2	-1.06463	12.8191	0.000343104	0.00700922
	OAS3	-1.31043	12.816	0.000343673	0.00701387
	FLJ10357	-1.05911	12.7806	0.000350229	0.00714057
	INE2	4.33586	12.7787	0.000350581	0.00714065
	HSPB8	-1.20074	12.7753	0.00035122	0.00714369
	EPHA4	1.47553	12.7742	0.000351426	0.00714369
	RGS22	5.52555	12.7722	0.000351808	0.00714439
	NFE2L2	1.03882	12.757	0.00035468	0.00719422
	ICA1	-3.97503	12.7555	0.000354963	0.00719422
	FAS	-1.26119	12.7495	0.000356098	0.00721011
	C17orf28	1.78864	12.7457	0.000356819	0.0072176
	PYCRL	-1.16005	12.739	0.000358117	0.00723672
	GDNF	-5.53416	12.7304	0.000359764	0.00725714
	NEDD9	1.44752	12.73	0.000359835	0.00725714
	HCFC1R1	1.05276	12.7135	0.00036303	0.00731439
	GOLPH3L	1.07237	12.7075	0.000364201	0.0073308
	KIAA0895L	1.15488	12.7005	0.000365554	0.00735083
	WDTC1	0.930727	12.6965	0.000366349	0.00735959
	GOLGA8DP	-5.39774	12.692	0.000367216	0.00736634
	LNPEP	0.941206	12.6911	0.000367402	0.00736634
	PRIMA1	-5.60354	12.6768	0.000370228	0.00741575
	IRX5	2.26481	12.6693	0.000371716	0.0074383
	TSPAN8	3.13675	12.6639	0.000372775	0.00745222
	TTC27	-0.997252	12.6601	0.000373534	0.00746014
	WNK2	0.943209	12.646	0.000376365	0.00750939
	SLC12A5	2.23947	12.6207	0.000381499	0.00760443
	SNX8	-1.3498	12.6128	0.000383114	0.00762921
	ATAD2	-1.23004	12.5982	0.000386121	0.00768164
	ZP4	-4.27536	12.5924	0.000387313	0.00769789
	PSMD12	-0.940009	12.5744	0.00039107	0.00776504
	FAM198B	1.01976	12.5679	0.000392427	0.00778446
	WNT7A	-1.20933	12.5643	0.000393179	0.00778535
	LOC100192378	3.12252	12.5641	0.00039323	0.00778535
	TGFBR3	0.915088	12.554	0.000395356	0.0078199
	CCDC80	1.02434	12.5187	0.000402889	0.00796122
	ROR1	-5.53889	12.489	0.000409357	0.00808125
	FAM19A3	-2.99553	12.4797	0.000411403	0.00811385
	CD164L2	2.46151	12.465	0.000414651	0.00817007
	FMO3	3.49874	12.4599	0.00041578	0.00818445
	CCND3	-0.967285	12.4468	0.000418708	0.00823136
	FAAH	1.41399	12.4457	0.000418965	0.00823136
	HCG4	-3.76401	12.4388	0.000420509	0.00825379
	MYPN	-3.33775	12.4337	0.000421655	0.00826838
	AKR1C3	1.40735	12.4284	0.000422858	0.00828406
	PSMA3	-0.959974	12.4179	0.00042524	0.00832278
	CAMK1G	2.74231	12.4148	0.000425942	0.00832858
	TCP1	-1.12181	12.4098	0.000427094	0.00834317
	IGF2BP3	-0.940086	12.3937	0.000430789	0.00840735
	?	-1.89943	12.3527	0.00044034	0.00858559
	SOX21	0.933098	12.3428	0.000442689	0.0086232
	SPINK5	1.8887	12.3358	0.000444345	0.00864725
	ABCA6	5.38022	12.3276	0.000446303	0.00867713
	C7orf57	-3.30805	12.3192	0.000448323	0.00870816
	DNHD1	1.54093	12.2947	0.000454256	0.00880774
	FBN2	-1.26507	12.2944	0.000454308	0.00880774
	GNRHR2	1.31007	12.2898	0.000455444	0.00882143
	C14orf149	-1.26211	12.2774	0.000458485	0.00887196
	PDE2A	-3.69231	12.2754	0.000458962	0.00887283
	CRTC1	0.929934	12.2655	0.000461409	0.00891175
	C14orf147	0.93129	12.2609	0.000462552	0.00892544
	LTA	-3.84855	12.2535	0.000464378	0.00895225
	RANBP1	-1.05904	12.2444	0.000466651	0.00898762
	C11orf82	-1.0317	12.2214	0.000472456	0.00909091
	AIMP2	-0.948741	12.2181	0.000473288	0.00909838
	CBX4	1.09917	12.2145	0.000474189	0.00910518
	PACRG	5.33816	12.2116	0.000474942	0.00910518
	NLRP4	2.98238	12.2114	0.000474972	0.00910518
	CDK14	0.922959	12.1992	0.000478091	0.00915174
	DOCK3	1.21349	12.1985	0.000478292	0.00915174
	HMOX2	-0.927209	12.1885	0.000480855	0.00919221
	SRM	-0.946385	12.186	0.000481495	0.00919588
	MICB	-1.58824	12.1822	0.000482466	0.00920586
	FADS2	1.62792	12.1738	0.000484653	0.00923626
	ZNF862	1.62406	12.1726	0.000484959	0.00923626
	RRM2	-1.08917	12.1586	0.000488608	0.00929714
	DCAF13	-0.890167	12.1481	0.000491368	0.009341
	CCDC74A	1.53784	12.1271	0.000496956	0.00943849
	SQLE	-1.12877	12.1241	0.000497742	0.00944468
	SOX12	0.937446	12.0897	0.000507015	0.00961155
	MEF2A	0.950594	12.0876	0.000507587	0.00961155
	FYN	1.26738	12.0863	0.000507941	0.00961155
	CLIC6	3.62069	12.0831	0.00050882	0.00961705
	POLE4	-1.08659	12.0818	0.000509168	0.00961705
	PSMA1	-0.940675	12.0754	0.00051092	0.00964126
	FAM35B	-5.47321	12.0647	0.000513854	0.00968773
	ESM1	-3.81804	12.0504	0.000517809	0.00975334
	CXCL11	-3.52654	12.0413	0.000520342	0.00979207
	GPR116	-3.58772	12.0278	0.000524132	0.00984904
	C1orf63	1.44953	12.0271	0.000524329	0.00984904
	SMTNL2	2.24552	12.0195	0.000526459	0.00988
	TMC4	1.14094	11.9913	0.000534489	0.0100215
	IDH2	1.07749	11.9696	0.000540756	0.0101298
	C9orf25	-1.12815	11.9589	0.000543875	0.0101789
	ADAMTS16	-5.41355	11.9558	0.000544774	0.010186
	LYPD1	1.2301	11.9542	0.000545244	0.010186
	PNP	-0.983715	11.9511	0.000546162	0.0101863
	FRS2	0.902269	11.9508	0.000546252	0.0101863
	TUBA4A	-1.16445	11.9453	0.00054786	0.010207
	STK10	-0.933058	11.9327	0.000551564	0.0102667
	SLC16A11	3.7598	11.9305	0.00055222	0.0102696
	EBNA1BP2	-0.949315	11.9238	0.000554225	0.0102974
	CDCA3	-1.1487	11.9221	0.000554718	0.0102974
	PRSS23	-1.329	11.9157	0.000556633	0.0103195
	AKR1B1	-0.961122	11.9138	0.000557207	0.0103195
	ALS2CR8	2.12381	11.9131	0.000557415	0.0103195
	FAM181A	-4.43872	11.9066	0.000559349	0.0103459
	AGR2	1.12722	11.8945	0.000562996	0.010404
	LOC100271831	-5.42835	11.8814	0.000566974	0.0104681
	GOLGA8E	5.30394	11.8713	0.00057007	0.0105158
	DLX4	1.98078	11.8579	0.000574182	0.0105822
	BTBD16	3.38576	11.8434	0.000578658	0.0106551
	REPS2	1.61306	11.8412	0.00057936	0.0106585
	GBP5	-1.34044	11.8374	0.000580515	0.0106682
	WISP2	-5.42	11.8361	0.000580929	0.0106682
	TXN	-1.06838	11.8303	0.000582748	0.0106897
	COL25A1	-3.28263	11.8284	0.000583345	0.0106897
	SYCE1L	2.96413	11.8274	0.000583662	0.0106897
	KLF8	1.11216	11.8174	0.000586785	0.0107333
	KLK11	1.41173	11.8165	0.000587088	0.0107333
	MGC21881	1.17738	11.8118	0.000588577	0.0107509
	C7orf41	1.05722	11.7986	0.00059274	0.0108174
	C1R	1.26608	11.7868	0.000596525	0.0108691
	DAPK1	-3.51417	11.7865	0.000596634	0.0108691
	EPDR1	-1.36347	11.7701	0.000601912	0.0109555
	RFX5	0.955165	11.7564	0.000606358	0.0110267
	CAB39L	1.64837	11.7472	0.000609341	0.0110711
	AQP3	2.25484	11.7436	0.000610525	0.0110828
	MFAP2	0.897557	11.7414	0.000611266	0.0110865
	NR2F2	0.936589	11.7335	0.000613841	0.0111234
	STARD13	-1.61695	11.7133	0.000620547	0.0112324
	AES	0.953957	11.7121	0.000620951	0.0112324
	FHOD1	-0.908661	11.7015	0.000624512	0.0112816
	IVNS1ABP	1.06497	11.6993	0.000625226	0.0112816
	LAMA3	-1.32747	11.699	0.000625321	0.0112816
	GRM8	2.64258	11.6901	0.000628319	0.0113243
	PRSS3	-2.99696	11.6887	0.000628824	0.0113243
	PSMD1	-0.94065	11.6871	0.00062934	0.0113243
	CACNG4	1.36426	11.6808	0.000631487	0.0113529
	ADARB2	5.25996	11.6774	0.000632628	0.0113605
	GPX3	-1.29262	11.6763	0.000633015	0.0113605
	TRIM6	-1.27275	11.6744	0.000633648	0.0113619
	TSC22D1	0.886452	11.6658	0.000636587	0.0114047
	SH3GL2	2.0763	11.6636	0.000637342	0.0114083
	ANKRD22	-1.20422	11.6615	0.000638083	0.0114116
	SH3YL1	1.04699	11.6548	0.000640363	0.0114424
	ABLIM3	-0.987341	11.6455	0.000643575	0.0114898
	SUSD3	2.30742	11.6428	0.000644498	0.0114963
	AMZ1	-2.03779	11.6395	0.000645672	0.0115072
	GTF2H2	-1.19581	11.6367	0.000646621	0.0115141
	PKHD1L1	3.01337	11.6252	0.000650627	0.0115754
	SIDT1	1.63983	11.6149	0.000654256	0.011622
	CLN6	-0.880011	11.6145	0.00065438	0.011622
	DLG2	2.91549	11.6059	0.000657427	0.0116623
	C9orf130	1.2491	11.6049	0.000657782	0.0116623
	SEC61G	-0.877539	11.5959	0.000660977	0.0117076
	PSMC2	-0.913366	11.5944	0.000661509	0.0117076
	CELP	2.49486	11.5926	0.000662131	0.0117076
	CPEB3	1.64781	11.5907	0.00066281	0.0117076
	ABCA1	0.942755	11.5897	0.00066319	0.0117076
	PLEKHM3	1.06316	11.5809	0.000666338	0.0117531
	OCA2	2.06891	11.5734	0.000669011	0.0117901
	ZNF318	0.95278	11.5639	0.000672456	0.0118407
	GNG11	-1.43122	11.5457	0.000679053	0.0119466
	ACTN1	-1.27802	11.5278	0.000685613	0.0120517
	MBTD1	0.907844	11.511	0.000691839	0.0121507
	ZFP57	-5.2407	11.509	0.0006926	0.0121522
	MUC4	0.891157	11.5076	0.000693108	0.0121522
	CAND2	2.26768	11.4835	0.000702176	0.0123007
	ARX	3.47571	11.4791	0.000703847	0.0123194
	ME1	-0.910336	11.4761	0.000704985	0.0123265
	SDPR	1.5541	11.4747	0.000705515	0.0123265
	TPTE2P1	3.3814	11.4732	0.000706053	0.0123265
	TM7SF2	1.71877	11.4715	0.000706721	0.0123277
	NELL1	2.74918	11.4596	0.000711237	0.0123959
	POP7	-0.919985	11.4535	0.000713582	0.0124263
	MAPT	1.17472	11.4337	0.000721252	0.0125492
	DRAP1	-0.939084	11.4238	0.000725087	0.0126052
	MCOLN3	1.23705	11.4141	0.000728901	0.0126547
	LOC440461	2.46827	11.4134	0.000729167	0.0126547
	SH2B3	-1.1045	11.3949	0.000736473	0.0127707
	SETDB1	0.915441	11.3849	0.000740417	0.0128283
	TMC5	-3.22845	11.3669	0.00074766	0.0129428
	HTR7	-2.47421	11.3502	0.000754406	0.0130459
	PSD4	0.879778	11.349	0.000754883	0.0130459
	ARFGAP3	0.872742	11.335	0.000760606	0.0131337
	C17orf103	1.75212	11.3145	0.00076906	0.0132686
	NCAPG	-0.902076	11.3078	0.000771813	0.0133049
	ZNF704	1.17757	11.2888	0.000779748	0.0134304
	ADM2	1.26186	11.2824	0.00078246	0.0134565
	JHDM1D	1.80369	11.2821	0.000782573	0.0134565
	ZNF253	-2.50968	11.2801	0.000783431	0.0134599
	RRS1	-0.942558	11.2735	0.000786228	0.0134967
	RELN	1.36351	11.2682	0.00078845	0.0135214
	ABCA12	-1.35589	11.266	0.000789383	0.0135214
	PRUNE	1.02241	11.2605	0.000791722	0.0135214
	ITGAV	-1.01716	11.2605	0.000791758	0.0135214
	ARSA	1.21825	11.2602	0.000791874	0.0135214
	CGB8	-3.62436	11.2589	0.000792429	0.0135214
	SERPINA1	-3.16748	11.2561	0.000793599	0.0135214
	INPP4B	-0.891919	11.2556	0.000793829	0.0135214
	FAM54A	-1.29078	11.2548	0.000794186	0.0135214
	FLNB	-1.16754	11.2546	0.000794255	0.0135214
	FAM3D	3.75242	11.2425	0.000799454	0.0135987
	ARPC1A	-1.09506	11.24	0.000800511	0.0136054
	SERPINF2	1.22746	11.2276	0.000805883	0.0136854
	VSIG10L	1.27515	11.2209	0.000808805	0.0137236
	YARS2	-0.873661	11.2122	0.000812598	0.0137766
	CDK19	1.07655	11.21	0.00081358	0.0137819
	PSMA2	-0.922469	11.2061	0.0008153	0.0137996
	CTF1	1.3161	11.1856	0.000824352	0.0139413
	ALDH2	0.895539	11.1681	0.000832151	0.0140616
	MRTO4	-0.893723	11.1228	0.000852742	0.0143859
	FER1L4	-1.49109	11.1219	0.000853152	0.0143859
	SOD3	1.80289	11.1212	0.000853445	0.0143859
	HLA-DRB1	3.20977	11.1086	0.000859269	0.0144722
	KLHL14	3.82151	11.0959	0.000865186	0.0145599
	PNO1	-0.867173	11.0897	0.000868091	0.0145969
	TMEM170B	1.49894	11.0811	0.000872123	0.0146527
	TUBA1C	-1.35845	11.0768	0.000874156	0.0146718
	SLC16A10	1.93321	11.0748	0.000875073	0.0146718
	B4GALNT3	0.887185	11.0741	0.000875403	0.0146718
	FGFR1OP	-1.21675	11.0657	0.000879398	0.0147267
	PHF10	0.8716	11.059	0.000882579	0.0147679
	UNC5B	2.71079	11.0486	0.000887531	0.0148387
	ZNF740	0.857026	11.0326	0.000895219	0.014955
	WNT10A	0.882272	11.0292	0.000896895	0.0149708
	DARS2	-0.869531	11.0269	0.000897978	0.0149768
	NCKAP1L	-4.4913	11.0253	0.000898755	0.0149776
	RUNDC3B	1.9118	11.0199	0.000901395	0.0150094
	SERPINB6	-0.95789	11.0133	0.000904589	0.0150416
	ARHGAP23	1.11274	11.0129	0.000904798	0.0150416
	FOXM1	-1.08982	11.0039	0.000909225	0.015103
	DNAJA1	-1.04131	10.9913	0.000915392	0.0151931
	GRB7	0.854481	10.9866	0.000917723	0.0152195
	EMP2	0.958664	10.9754	0.000923292	0.0152995
	TRIM62	1.07414	10.9693	0.000926355	0.0153379
	LOC728643	-1.38391	10.9589	0.000931565	0.0154117
	MRPL21	-0.865106	10.9574	0.000932322	0.0154118
	CDK18	0.966822	10.9483	0.000936879	0.0154747
	C5orf41	1.71902	10.943	0.000939592	0.015507
	RARG	0.900684	10.9352	0.000943539	0.0155597
	MRPL18	-0.852487	10.9266	0.000947955	0.01562
	GCLM	-0.904074	10.9251	0.000948719	0.01562
	CCDC154	1.81375	10.9214	0.000950591	0.0156383
	TMEM130	2.65221	10.9169	0.000952885	0.0156635
	LMO3	1.87458	10.9013	0.000960978	0.0157839
	SUGT1	-0.91859	10.8973	0.000963027	0.0158049
	DUSP23	0.929412	10.8863	0.000968803	0.0158823
	OSBPL7	1.26429	10.8853	0.00096929	0.0158823
	CRYL1	2.86606	10.8717	0.000976472	0.0159775
	SERPINI1	1.39695	10.8713	0.000976658	0.0159775
	RPL13AP20	0.863499	10.8589	0.000983213	0.0160719
	LOC100133920	-5.13584	10.8556	0.000984986	0.0160881
	PPM1H	0.963066	10.8535	0.000986116	0.0160938
	AEBP1	-1.72818	10.8502	0.000987866	0.0161095
	ZBTB5	0.900579	10.8305	0.000998438	0.0162667
	SH3TC2	-1.16823	10.8293	0.000999091	0.0162667
	PSMB7	-0.997488	10.8246	0.0010016	0.0162946
	TLR5	2.90049	10.8106	0.00100922	0.0164056
	SRGAP3	0.985432	10.7974	0.0010164	0.0165093
	FNBP1L	0.988963	10.7833	0.00102418	0.0166102
	DHX40	0.848278	10.7832	0.00102423	0.0166102
	CAPG	-0.897561	10.7793	0.00102641	0.0166248
	CDH4	-2.2744	10.7787	0.00102675	0.0166248
	ORC1L	-0.982496	10.7666	0.00103349	0.0167198
	LOC440905	1.53876	10.7652	0.00103425	0.0167198
	SIX5	1.15383	10.7616	0.00103628	0.0167395
	TACC3	-0.935871	10.7598	0.00103731	0.016743
	ERO1L	-0.971652	10.7541	0.0010405	0.0167813
	NSUN5	-1.00733	10.7325	0.00105268	0.0169643
	SPRY1	1.09392	10.7258	0.00105651	0.0170128
	MMP9	-2.18802	10.7226	0.00105834	0.0170288
	NPY1R	1.8068	10.7197	0.00106003	0.017039
	MYO15B	2.43974	10.7186	0.00106063	0.017039
	MRPL39	-1.14353	10.7123	0.00106427	0.017073
	GSTA1	5.13563	10.712	0.00106441	0.017073
	LOC286367	2.53355	10.7098	0.00106572	0.0170806
	SBDSP1	-0.980366	10.7056	0.00106813	0.017106
	NOTCH3	1.23329	10.6796	0.00108325	0.0173345
	MLLT3	1.08119	10.6766	0.00108502	0.0173493
	WDR25	1.13478	10.6749	0.00108602	0.0173517
	AASS	1.27176	10.6703	0.00108872	0.0173813
	OLFML1	3.65759	10.6671	0.0010906	0.0173979
	LOC728606	2.90603	10.6462	0.00110297	0.0175816
	C10orf10	-1.94052	10.6425	0.0011052	0.0176034
	ALOXE3	-3.20825	10.6407	0.00110624	0.0176064
	MRGPRX3	-3.27277	10.6388	0.00110742	0.0176114
	TLR2	-1.41892	10.6358	0.00110917	0.0176219
	MAP3K12	1.44932	10.6348	0.00110979	0.0176219
	SERINC2	-0.972357	10.6285	0.00111357	0.0176554
	ASAP1	-0.925796	10.6284	0.00111362	0.0176554
	C3orf32	2.66556	10.6265	0.00111478	0.0176602
	VWF	1.89764	10.6237	0.00111648	0.0176658
	FUCA2	-0.888717	10.6231	0.00111686	0.0176658
	BCL2A1	-3.96589	10.6196	0.00111898	0.0176857
	METTL11A	-0.936812	10.6174	0.0011203	0.0176929
	GPATCH4	-0.839473	10.6135	0.00112262	0.0177124
	DMRT1	-3.03665	10.6125	0.00112325	0.0177124
	SMOX	-2.03244	10.6016	0.00112987	0.0178031
	MPP1	-1.92244	10.5994	0.00113123	0.0178107
	B3GALT4	1.50835	10.5868	0.00113898	0.017919
	ING4	1.36137	10.5779	0.00114449	0.0179919
	BOLA3	-1.03377	10.5729	0.00114758	0.0180267
	CFB	-1.66423	10.5642	0.00115298	0.0180977
	KLHL13	0.910849	10.5535	0.00115969	0.0181892
	TUBB6	-1.1199	10.5491	0.00116242	0.0182096
	TOR1AIP1	-0.860543	10.5486	0.00116277	0.0182096
	KIAA1370	1.15191	10.5463	0.00116418	0.0182178
	TSHZ1	1.54591	10.5441	0.00116557	0.0182257
	DDX56	-0.865424	10.5384	0.00116918	0.0182682
	TET1	1.0719	10.5348	0.0011715	0.0182885
	FAM172A	1.00035	10.5336	0.00117226	0.0182885
	PARP12	-0.932466	10.5283	0.00117558	0.0183264
	CCT8	-0.966813	10.5169	0.00118288	0.018424
	PSMA6	-0.906956	10.5157	0.00118363	0.018424
	LOC284837	1.12842	10.5139	0.00118477	0.0184277
	SNRNP25	-0.990777	10.5007	0.00119332	0.0185465
	CELSR2	1.1851	10.4977	0.00119526	0.0185627
	FGFR2	1.93562	10.4894	0.00120063	0.0186321
	LBR	-0.947893	10.487	0.00120216	0.0186416
	CCRN4L	-1.43705	10.4829	0.00120483	0.018669
	OSM	-5.10065	10.4767	0.00120889	0.0187178
	UCP2	1.12565	10.4343	0.00123695	0.0191311
	ENPP1	1.1332	10.4331	0.00123775	0.0191311
	C1orf175	4.07736	10.4322	0.00123838	0.0191311
	ZNF385B	1.4107	10.4291	0.00124046	0.0191488
	HNMT	-5.05614	10.4229	0.00124463	0.0191959
	GMCL1	1.01417	10.4218	0.00124538	0.0191959
	C15orf17	1.00156	10.4162	0.00124917	0.0192399
	KIAA1644	-5.12005	10.4092	0.00125391	0.0192984
	CTGF	1.01274	10.4053	0.00125652	0.0193241
	ANO8	0.982563	10.4014	0.00125922	0.0193511
	ZYX	-0.949835	10.3912	0.00126617	0.0194434
	C20orf24	-0.882507	10.385	0.00127042	0.0194941
	CABP1	-3.31356	10.3824	0.0012722	0.0195068
	CCDC85B	-0.819329	10.3787	0.00127475	0.0195313
	CTDSP2	1.00109	10.3743	0.00127783	0.0195639
	ITGAM	-4.19618	10.3716	0.00127967	0.0195774
	COL4A3	1.80931	10.3681	0.00128214	0.0195896
	AQP7	2.48307	10.3669	0.00128292	0.0195896
	LOC283070	1.22788	10.3663	0.00128333	0.0195896
	FBXL17	1.11565	10.358	0.00128913	0.0196635
	IL31RA	-2.13969	10.3492	0.00129533	0.0197435
	PAMR1	2.42543	10.346	0.00129759	0.0197632
	BEX5	-3.61517	10.333	0.0013067	0.0198872
	RAD18	-1.13646	10.3272	0.00131087	0.0199283
	ITGB2	-1.90697	10.3265	0.00131134	0.0199283
	NDUFB9	-0.841962	10.321	0.00131525	0.0199714
	LMO2	2.3552	10.3198	0.00131612	0.0199714
	TMPRSS2	2.73185	10.3099	0.00132316	0.0200515
	SLC4A9	-3.73388	10.3097	0.00132335	0.0200515
	ST5	-1.09676	10.3059	0.00132606	0.0200777
	PABPC4L	1.1252	10.2904	0.00133722	0.0202236
	WDR67	-1.14989	10.2897	0.00133772	0.0202236
	CSAD	1.54084	10.2885	0.00133865	0.0202236
	CTSL2	-1.06733	10.2848	0.00134133	0.0202491
	MAML3	1.71287	10.2799	0.00134489	0.020288
	ADC	2.61524	10.2493	0.00136737	0.0206011
	IFT140	1.06991	10.2489	0.00136765	0.0206011
	GLIS2	0.825369	10.2388	0.00137519	0.0206995
	LOC389332	3.20173	10.233	0.0013795	0.0207491
	RFX8	-3.34608	10.2109	0.00139614	0.0209839
	LDLRAP1	0.865875	10.2019	0.00140298	0.0210463
	CCDC28A	1.27868	10.2014	0.00140336	0.0210463
	DERA	-0.838341	10.2014	0.00140336	0.0210463
	NLGN1	1.87848	10.1921	0.00141043	0.0211369
	C9orf7	1.05669	10.1791	0.0014204	0.0212708
	2018-09-10	0.84074	10.1728	0.00142529	0.0213284
	NOG	-3.42453	10.1713	0.0014264	0.0213296
	C4orf49	2.41509	10.163	0.00143285	0.0214104
	FAM182A	5.03161	10.1604	0.00143492	0.0214257
	C7orf60	1.13231	10.1556	0.00143865	0.0214658
	TRIM72	-3.09412	10.1418	0.00144945	0.0216112
	MFAP3L	1.11185	10.1382	0.00145227	0.0216297
	TET2	0.831473	10.1375	0.00145279	0.0216297
	OBSL1	1.10721	10.1361	0.00145394	0.021631
	DHX37	-0.875055	10.1316	0.00145747	0.0216678
	DDX17	1.10059	10.1129	0.00147237	0.0218735
	ARL5A	0.857592	10.0966	0.00148543	0.0220516
	KRT80	-1.11819	10.0939	0.00148762	0.0220682
	AK5	2.81	10.0817	0.00149751	0.0221988
	TRIB2	0.842487	10.0756	0.00150243	0.0222557
	STXBP1	-1.2995	10.0404	0.00153147	0.0226695
	FAM113A	1.14399	10.0351	0.00153586	0.0227182
	TOR3A	-0.915374	10.0159	0.00155198	0.0229326
	GGCT	-0.919573	10.0151	0.00155259	0.0229326
	C6orf138	1.59198	10.0046	0.00156152	0.0230479
	TSPAN12	1.07332	10.0024	0.0015634	0.0230591
	IKZF2	1.02455	9.99684	0.00156809	0.0230828
	TSC22D2	-0.875624	9.99681	0.00156812	0.0230828
	KLHDC9	3.13186	9.99649	0.00156839	0.0230828
	TLR6	-1.80735	9.99094	0.00157312	0.0231359
	RASGRP4	-2.90198	9.98565	0.00157765	0.0231859
	PDE7B	1.88912	9.97767	0.0015845	0.0232699
	ANKRD10	0.919012	9.97404	0.00158763	0.0232992
	FGFR3	1.35422	9.9686	0.00159232	0.0233514
	C15orf41	0.850438	9.96616	0.00159443	0.0233657
	DLX1	1.03259	9.96051	0.00159934	0.0234209
	C2orf55	1.1585	9.95255	0.00160627	0.0235055
	DCAKD	1.04662	9.94851	0.0016098	0.0235404
	IPO5	-0.977025	9.94419	0.00161358	0.0235638
	SIGLEC9	-3.298	9.94406	0.00161369	0.0235638
	DTX3	0.867737	9.9414	0.00161603	0.0235811
	CACNA2D3	1.53346	9.93661	0.00162024	0.0236084
	TAP1	-0.830702	9.93575	0.001621	0.0236084
	TMPRSS11A	2.26389	9.93477	0.00162186	0.0236084
	ACSS1	1.01544	9.93404	0.0016225	0.0236084
	RASGRF1	-1.32463	9.91375	0.00164048	0.0238532
	GLYATL3	3.19611	9.912	0.00164205	0.0238591
	C14orf156	-0.928236	9.9106	0.0016433	0.0238603
	RAD54B	-1.31224	9.8993	0.00165342	0.0239903
	SMTN	-0.93723	9.89391	0.00165827	0.0240437
	HIST1H2BK	0.836592	9.89019	0.00166162	0.0240753
	NUDCD1	-0.822443	9.88717	0.00166435	0.0240978
	RGMA	2.19565	9.88232	0.00166875	0.0241436
	SLC19A1	-0.810457	9.88078	0.00167015	0.0241436
	TMEM14B	-0.817115	9.8798	0.00167103	0.0241436
	SNCA	1.00338	9.87469	0.00167568	0.0241936
	SULT1A1	1.50493	9.87237	0.00167779	0.0242072
	PRKY	2.60943	9.86496	0.00168456	0.0242877
	ZXDA	-3.59123	9.85855	0.00169044	0.0243554
	RFTN1	-1.24505	9.85461	0.00169407	0.0243906
	TNS4	1.22832	9.84589	0.00170212	0.0244741
	HACL1	-1.1107	9.84574	0.00170226	0.0244741
	RGNEF	-0.924174	9.84241	0.00170534	0.0245013
	TCF7L1	-2.93092	9.83647	0.00171086	0.0245633
	SORL1	0.962006	9.83201	0.00171501	0.0246058
	IFITM1	0.844828	9.82508	0.00172148	0.0246814
	NBR1	0.853715	9.81171	0.00173404	0.0248441
	SLC15A2	1.23809	9.80456	0.00174079	0.0249209
	ATAD3A	-0.834036	9.80099	0.00174418	0.0249209
	CDH13	1.56434	9.80075	0.0017444	0.0249209
	MAPK15	2.21032	9.7998	0.00174531	0.0249209
	NME1	-0.85177	9.79963	0.00174547	0.0249209
	FGF17	2.62385	9.79334	0.00175145	0.0249727
	CGGBP1	0.839669	9.79259	0.00175216	0.0249727
	RPF2	-1.04867	9.79198	0.00175275	0.0249727
	ZCCHC24	-1.63645	9.78693	0.00175757	0.025024
	SH2B1	0.987843	9.78292	0.0017614	0.0250359
	MYLIP	1.13094	9.78237	0.00176194	0.0250359
	HLA-DRB5	3.67831	9.78193	0.00176235	0.0250359
	TMEFF1	-1.34381	9.78096	0.00176328	0.0250359
	MT3	4.99499	9.77813	0.001766	0.0250572
	SMAD9	2.29656	9.76693	0.00177679	0.0251928
	ZFC3H1	0.829199	9.76369	0.00177992	0.0252198
	HECA	0.821022	9.74277	0.00180029	0.0254909
	NKAIN2	1.98497	9.73825	0.00180473	0.0255154
	PCK2	0.818162	9.73743	0.00180553	0.0255154
	CHST9	3.2049	9.73721	0.00180575	0.0255154
	ATP2B4	0.856359	9.73582	0.00180712	0.0255172
	SYNJ2	-0.844063	9.72646	0.00181634	0.0256297
	EPHA10	-1.69691	9.71755	0.00182516	0.0257269
	NCEH1	-0.788127	9.71698	0.00182573	0.0257269
	C9orf152	2.35541	9.71426	0.00182844	0.0257474
	EGR2	2.31633	9.70856	0.00183412	0.0257788
	CYCS	-0.916783	9.70561	0.00183706	0.0257788
	MAGEF1	0.904432	9.70519	0.00183748	0.0257788
	UCHL3	-0.890251	9.70149	0.00184119	0.0257788
	TMPRSS4	0.882611	9.70123	0.00184145	0.0257788
	TNNI3K	2.59683	9.70118	0.0018415	0.0257788
	PSMB1	-0.893972	9.70114	0.00184154	0.0257788
	MDK	1.03279	9.70093	0.00184175	0.0257788
	TRIM6-TRIM34	-5.01475	9.70071	0.00184197	0.0257788
	B3GNT7	-1.43046	9.69865	0.00184404	0.0257901
	BHMT2	-1.83266	9.69448	0.00184823	0.0258311
	CPT1B	1.2727	9.69067	0.00185206	0.0258671
	TMEM139	1.13213	9.68476	0.00185803	0.0259328
	TNFSF13B	-4.03279	9.68263	0.00186018	0.0259452
	EPB41L4A	1.07906	9.67597	0.00186694	0.0260218
	CXCR6	-3.62191	9.67029	0.00187272	0.0260847
	IL23A	-2.25277	9.65964	0.00188361	0.0262185
	MYST4	0.798782	9.65494	0.00188843	0.0262678
	C8orf73	-0.906184	9.65344	0.00188998	0.0262716
	TRIM4	0.871295	9.64865	0.00189491	0.026312
	ERBB2	0.919192	9.64813	0.00189545	0.026312
	GRM3	2.17272	9.64566	0.001898	0.0263296
	TNIP3	-2.78695	9.633	0.00191113	0.0264938
	HIST1H3E	1.84795	9.63074	0.00191348	0.0265085
	TNFAIP2	-1.08207	9.62872	0.00191558	0.0265198
	PTK2B	-0.88039	9.61309	0.00193195	0.0267283
	SLC45A3	-1.19153	9.60465	0.00194085	0.0268334
	LOC728264	2.52277	9.59945	0.00194636	0.0268914
	CNKSR3	0.797145	9.58849	0.00195801	0.0270295
	YKT6	-0.840668	9.58758	0.00195898	0.0270295
	GRPEL1	-0.841131	9.58624	0.00196041	0.027031
	TRIM14	-0.828285	9.58317	0.00196369	0.0270581
	TMEM173	0.970406	9.57792	0.00196932	0.0271172
	SLC4A7	0.932365	9.5767	0.00197063	0.0271172
	GOLGA8A	0.828028	9.57446	0.00197303	0.0271322
	P4HA2	-0.80577	9.56307	0.00198531	0.0272827
	IL24	-4.91298	9.56051	0.00198808	0.0272888
	POLR3G	-1.38489	9.5602	0.00198841	0.0272888
	RBM28	-0.80001	9.55327	0.00199593	0.0273737
	MRPL52	-0.79726	9.54841	0.00200123	0.0274281
	PDCD1	-2.48902	9.5372	0.00201349	0.0275776
	GRK7	2.76623	9.53337	0.0020177	0.0276169
	REV3L	0.834335	9.53128	0.00202	0.02763
	CCNA2	-0.849481	9.52749	0.00202417	0.0276686
	MSTN	4.92869	9.51061	0.00204287	0.0279057
	RTCD1	-0.790672	9.50397	0.00205028	0.0279882
	BCCIP	-0.818303	9.50105	0.00205355	0.0280142
	LYPD2	4.97119	9.49417	0.00206126	0.0281007
	R3HDM2	0.81142	9.49096	0.00206486	0.0281196
	ITGB5	-0.820404	9.4905	0.00206538	0.0281196
	RRP7A	-0.830544	9.48487	0.00207173	0.0281873
	DUOXA1	1.97876	9.48281	0.00207405	0.0282003
	RPS6KA5	1.07475	9.47984	0.00207742	0.0282274
	TMEM64	0.793593	9.47007	0.00208851	0.0283582
	GRAMD1C	1.31545	9.46893	0.00208981	0.0283582
	GRAMD2	1.58244	9.46522	0.00209405	0.0283969
	KANK1	0.927402	9.45933	0.00210077	0.0284693
	FPGS	-0.842509	9.45723	0.00210319	0.0284721
	TCF19	-0.842972	9.45673	0.00210375	0.0284721
	GCLC	0.833445	9.45506	0.00210567	0.028478
	GMPS	-0.829175	9.45394	0.00210696	0.028478
	AKAP2	-1.21522	9.45271	0.00210838	0.0284784
	C16orf58	0.857863	9.4514	0.00210988	0.0284799
	THSD4	0.885378	9.44001	0.00212303	0.0286216
	SEMA6C	1.78569	9.43989	0.00212316	0.0286216
	SLC25A6	0.947875	9.4334	0.00213069	0.0287042
	C4orf26	-2.68594	9.42749	0.00213756	0.0287779
	LOC152225	-4.03799	9.42145	0.00214462	0.028854
	C1QTNF6	-4.89743	9.41407	0.00215327	0.0289514
	LOC100129550	1.94039	9.4033	0.00216595	0.0291028
	PARK2	2.43082	9.4018	0.00216773	0.0291077
	MECOM	0.901626	9.39461	0.00217624	0.0292029
	PPM1L	1.70405	9.38817	0.00218391	0.0292866
	GINS2	-0.825451	9.38122	0.00219219	0.0293785
	CENPN	-0.821501	9.3784	0.00219557	0.0293896
	FAM49B	-0.8292	9.37814	0.00219588	0.0293896
	HOOK2	0.808057	9.37259	0.00220254	0.029444
	NXPH4	0.908702	9.37236	0.00220281	0.029444
	C1orf161	1.32537	9.36881	0.00220709	0.029482
	BBS1	1.07911	9.36484	0.00221188	0.0295267
	UGT1A7	3.20086	9.34628	0.00223438	0.0298077
	ACSBG1	2.57281	9.34427	0.00223684	0.0298212
	MAGI3	0.867166	9.34303	0.00223835	0.0298219
	ATP6V0D2	-2.77417	9.33704	0.00224568	0.0299001
	MAML2	0.81696	9.3333	0.00225026	0.0299418
	C3AR1	-4.00533	9.3279	0.0022569	0.0299913
	C12orf32	-0.798285	9.3279	0.00225691	0.0299913
	HLA-DRA	-3.3704	9.31661	0.00227086	0.0301388
	C8orf30A	-0.900171	9.31654	0.00227094	0.0301388
	JMJD7-PLA2G4B	0.858646	9.31455	0.00227341	0.0301521
	CCDC86	-0.780703	9.31165	0.00227701	0.0301803
	PIAS3	0.805093	9.30847	0.00228097	0.0302132
	C10orf68	3.893	9.30391	0.00228665	0.030269
	VWA5B2	2.62278	9.29581	0.00229678	0.0303835
	SLC5A6	-0.785948	9.29111	0.00230269	0.030442
	COLQ	2.73744	9.28478	0.00231066	0.0305277
	ARL4C	0.867539	9.27959	0.00231721	0.0305946
	ADD2	-0.790513	9.2731	0.00232543	0.0306754
	NINL	1.00754	9.27241	0.00232632	0.0306754
	CDCA8	-0.820791	9.25865	0.00234386	0.0308756
	CDC20	-0.892114	9.25776	0.00234499	0.0308756
	SPSB3	0.890137	9.25697	0.00234601	0.0308756
	TIMP1	-0.909123	9.2552	0.00234828	0.0308856
	GPR87	-0.992009	9.25289	0.00235125	0.0309049
	SIX2	1.065	9.24919	0.002356	0.0309476
	PLEKHG4	0.869038	9.24699	0.00235883	0.030965
	AURKA	-0.844113	9.23794	0.00237051	0.0310984
	NR4A1	2.85434	9.23244	0.00237765	0.0311721
	GGT7	1.39812	9.22952	0.00238144	0.0312019
	PIPOX	0.910227	9.22407	0.00238853	0.0312749
	OAT	-1.31237	9.20446	0.00241427	0.0315916
	FBXL6	-0.923987	9.193	0.00242942	0.0317697
	CIRH1A	-0.847204	9.19089	0.00243223	0.0317861
	LLGL2	0.792684	9.18774	0.00243642	0.0318086
	GLS	-0.86945	9.18727	0.00243704	0.0318086
	MEGF9	0.899361	9.18114	0.00244522	0.0318951
	DONSON	-0.91498	9.17742	0.0024502	0.0319397
	KBTBD10	3.18942	9.17378	0.00245507	0.0319829
	GPR25	-3.46817	9.17207	0.00245737	0.0319925
	FLJ40852	2.60141	9.16726	0.00246384	0.032041
	CLCA3P	-2.67414	9.16698	0.00246421	0.032041
	PMFBP1	2.49534	9.1537	0.00248215	0.0322538
	PIK3R2	0.93918	9.15086	0.00248601	0.0322743
	KATNAL1	-1.18574	9.14987	0.00248735	0.0322743
	RBM19	-0.80106	9.14907	0.00248844	0.0322743
	ARHGEF9	1.14834	9.14337	0.00249621	0.0323352
	RAD51AP1	-0.87462	9.14331	0.00249629	0.0323352
	HTR1D	-1.89953	9.14175	0.00249841	0.0323423
	EEPD1	-1.66381	9.1398	0.00250108	0.0323565
	MPZ	-1.67053	9.13703	0.00250487	0.0323851
	ELK3	-0.867496	9.13472	0.00250804	0.0324057
	LGR4	0.954398	9.13105	0.00251307	0.0324502
	SH2D2A	-1.46926	9.12459	0.00252196	0.0325445
	BCAS1	1.98294	9.1215	0.00252623	0.0325792
	GRAMD4	0.794921	9.11877	0.00253001	0.0326074
	CECR1	-2.29445	9.11463	0.00253573	0.0326606
	NUDC	-0.802237	9.11206	0.00253929	0.032686
	GPRIN1	-1.02448	9.10935	0.00254306	0.0326965
	FAM53B	0.765678	9.10918	0.00254329	0.0326965
	SOCS5	0.85077	9.10776	0.00254528	0.0327015
	RAD51	-0.963424	9.09435	0.002564	0.0329215
	ABCC6P1	2.4646	9.08481	0.00257741	0.033073
	SYT16	-2.90152	9.08143	0.00258218	0.0331135
	TEAD4	-0.83505	9.07706	0.00258836	0.033172
	MACROD2	2.27119	9.07292	0.00259423	0.0332265
	PLA2G4C	-2.72691	9.06383	0.00260716	0.0333713
	HCRTR2	2.78126	9.04905	0.00262832	0.0336212
	GCNT3	-2.10098	9.04458	0.00263474	0.0336823
	CADM2	2.15407	9.03681	0.00264597	0.0337545
	EIF2AK2	-0.869631	9.03528	0.00264819	0.0337545
	CTSL1	-0.981173	9.03499	0.00264861	0.0337545
	TCF4	0.936506	9.03441	0.00264945	0.0337545
	GAA	1.52756	9.03431	0.00264959	0.0337545
	ZNF442	-2.77039	9.03235	0.00265244	0.0337545
	PADI1	-1.47508	9.03151	0.00265365	0.0337545
	EGR1	1.61182	9.03128	0.00265398	0.0337545
	NALCN	-2.47293	9.03046	0.00265518	0.0337545
	LACTB	-1.02233	9.0175	0.00267407	0.0339736
	FLJ45244	2.31402	9.01585	0.00267648	0.0339832
	GLDN	1.96813	9.0113	0.00268315	0.0340468
	BCAR3	-0.807581	9.00618	0.00269068	0.0341212
	SLC47A1	3.09503	8.99839	0.00270218	0.0342459
	ASB13	0.822205	8.99179	0.00271195	0.0343485
	KIAA1524	-0.885531	8.98888	0.00271628	0.0343822
	ITM2C	1.03054	8.98691	0.00271921	0.034398
	PUF60	-0.803672	8.98034	0.002729	0.0345006
	MRPL51	-0.80816	8.97725	0.00273362	0.0345333
	STX1A	-1.0435	8.97621	0.00273518	0.0345333
	UBE2T	-0.883731	8.97524	0.00273663	0.0345333
	LANCL1	0.758813	8.97373	0.00273889	0.0345406
	CD276	-0.837524	8.95539	0.00276652	0.0348677
	ARSD	0.858347	8.94557	0.00278143	0.0350341
	GTF2F2	-0.81544	8.94307	0.00278524	0.0350459
	SLC6A2	-4.83738	8.9421	0.00278672	0.0350459
	PTPRQ	2.93573	8.9416	0.00278749	0.0350459
	BCAS3	0.911791	8.93737	0.00279395	0.0351056
	MALAT1	1.04954	8.93564	0.0027966	0.0351174
	MACF1	-1.13645	8.92988	0.00280543	0.0352042
	RCAN2	2.68563	8.9289	0.00280694	0.0352042
	RELT	-1.07141	8.92725	0.00280947	0.0352145
	PLCD3	1.23941	8.92483	0.0028132	0.0352396
	SGSM3	0.919055	8.92117	0.00281884	0.035271
	KLHDC8B	1.18769	8.92098	0.00281914	0.035271
	RGS7	-4.86142	8.91925	0.0028218	0.0352828
	ABHD3	-1.02573	8.91537	0.00282781	0.0353295
	GRHL3	2.45939	8.91462	0.00282897	0.0353295
	ALDH1L2	0.828047	8.91001	0.00283611	0.0353971
	ULK2	1.38264	8.90749	0.00284003	0.0354245
	HEXDC	1.27419	8.90418	0.00284519	0.0354673
	POLA2	-0.895879	8.89951	0.00285247	0.0355364
	KRT9	2.59186	8.88873	0.00286937	0.0357253
	D2HGDH	1.10497	8.87992	0.00288324	0.035867
	CTSO	1.46126	8.87929	0.00288424	0.035867
	CIB1	-0.958538	8.87203	0.00289572	0.0359879
	SNX31	2.34227	8.85627	0.00292085	0.0362782
	IGF2BP1	-0.83097	8.83802	0.0029502	0.0366206
	ABCB6	0.813783	8.83642	0.00295277	0.0366304
	ORMDL2	-0.873233	8.83275	0.00295873	0.0366821
	ACSS3	1.1739	8.83146	0.00296081	0.0366858
	NGB	-1.57629	8.82645	0.00296895	0.0367645
	GBAS	0.775408	8.81828	0.00298228	0.0369073
	ERO1LB	1.40735	8.81406	0.00298917	0.0369703
	ERI1	-0.992588	8.80364	0.00300631	0.0371598
	TOMM40	-0.803858	8.79871	0.00301443	0.0372193
	RIPK4	0.873016	8.79852	0.00301474	0.0372193
	GALE	-0.795574	8.79663	0.00301788	0.0372356
	ZNF259	-0.804614	8.79546	0.00301981	0.0372364
	GALNT13	2.91791	8.7944	0.00302157	0.0372364
	SLC46A1	-1.82932	8.79006	0.00302877	0.0372991
	ABHD1	2.63045	8.78914	0.00303029	0.0372991
	ZSWIM4	0.901052	8.78665	0.00303442	0.0373276
	TGIF1	0.79667	8.7756	0.00305287	0.0375321
	RHOV	0.988234	8.76679	0.00306764	0.0376911
	GNL3	-0.789379	8.76341	0.00307334	0.0377385
	DISP2	-1.83515	8.75717	0.00308386	0.0378451
	SDR16C5	-3.37063	8.75209	0.00309247	0.0379141
	SLCO4A1	-0.816758	8.75167	0.00309318	0.0379141
	TLE2	1.70312	8.74487	0.00310474	0.0380223
	NCOA1	0.769935	8.7424	0.00310895	0.0380223
	GXYLT2	-2.54924	8.74235	0.00310904	0.0380223
	C3orf50	2.5654	8.74213	0.00310942	0.0380223
	HPD	-2.78784	8.739	0.00311476	0.038065
	HOXB9	-2.2502	8.73696	0.00311824	0.0380848
	CD24	1.01002	8.73418	0.003123	0.0381203
	PDGFRA	2.98254	8.72892	0.00313202	0.0382077
	STRAP	-0.899695	8.72507	0.00313864	0.0382657
	KDM4B	0.761463	8.71056	0.00316371	0.0385485
	C18orf1	2.83483	8.70577	0.00317204	0.038627
	IFT80	0.85514	8.70316	0.00317658	0.0386594
	RRM1	-0.878926	8.70057	0.0031811	0.0386915
	RRP15	-0.766717	8.69853	0.00318466	0.0387119
	IRS4	2.09219	8.69316	0.00319406	0.0387902
	UGT8	0.788044	8.69269	0.00319489	0.0387902
	SAMD9L	-0.998959	8.6895	0.00320048	0.0388352
	KLC4	1.07189	8.68577	0.00320704	0.0388917
	OLFM4	0.827411	8.67145	0.00323235	0.0391755
	PLA2G4D	-3.21335	8.66321	0.00324699	0.0392978
	KLHDC2	0.769535	8.66314	0.00324712	0.0392978
	FGR	2.51699	8.66254	0.00324818	0.0392978
	PEBP1	0.860506	8.66077	0.00325134	0.0393129
	P2RY8	-2.86977	8.65412	0.00326323	0.0394334
	DPP10	1.58194	8.65264	0.00326587	0.0394421
	ZFYVE9	0.915357	8.64555	0.00327862	0.0395728
	MBOAT1	0.93932	8.64283	0.0032835	0.0396085
	MIB1	0.814211	8.64062	0.0032875	0.0396334
	IMPDH1	-0.776138	8.63774	0.0032927	0.0396728
	ARNT	0.753965	8.62961	0.00330742	0.0398268
	KCNE3	1.77078	8.6208	0.00332345	0.0399963
	LOC728392	1.39279	8.61736	0.00332975	0.0400486
	SLC45A4	-0.863117	8.61234	0.00333893	0.0401321
	TNFRSF10A	-1.11429	8.61143	0.0033406	0.0401321
	CHD6	0.796901	8.60721	0.00334834	0.0402017
	IMP4	-0.787568	8.59136	0.00337761	0.0405269
	TCN2	1.03406	8.59041	0.00337938	0.0405269
	ZNF358	0.966038	8.58781	0.00338421	0.0405612
	RASAL2	-0.780196	8.58208	0.00339487	0.0406652
	SLC15A1	-1.80255	8.57684	0.00340465	0.0407586
	HCG22	-3.86753	8.57467	0.00340871	0.0407833
	SSSCA1	-0.878189	8.56454	0.00342774	0.0409871
	LTBR	-0.796991	8.55988	0.00343652	0.0410682
	KRT7	-1.33279	8.55052	0.00345423	0.0412559
	SPANXA2	-3.01057	8.54685	0.0034612	0.041315
	DBT	0.786217	8.54124	0.00347188	0.0414098
	VRK1	-0.882107	8.54008	0.0034741	0.0414098
	SPAG17	1.52089	8.53892	0.00347632	0.0414098
	M6PR	-0.839214	8.53846	0.0034772	0.0414098
	CTSE	-2.46646	8.5354	0.00348305	0.0414553
	PTCH1	0.924427	8.53146	0.00349059	0.0415211
	LZTS2	0.755173	8.528	0.00349724	0.0415539
	KLHL33	1.90986	8.52791	0.0034974	0.0415539
	NME4	-0.755152	8.51835	0.00351584	0.0417488
	ILK	-0.788165	8.51089	0.00353028	0.0418961
	NIPSNAP1	0.787749	8.50869	0.00353454	0.0419224
	LOC400027	1.31043	8.5068	0.00353821	0.0419394
	BMP2	1.03961	8.50491	0.0035419	0.0419394
	IL1F5	-2.17629	8.50379	0.00354407	0.0419394
	ARRDC4	-1.18791	8.50375	0.00354415	0.0419394
	NOC2L	-0.865528	8.50258	0.00354643	0.0419423
	PPFIBP1	-0.784478	8.49537	0.00356051	0.0420722
	MELK	-0.885531	8.49486	0.00356151	0.0420722
	GABBR1	1.19475	8.49297	0.00356522	0.0420742
	MRPL13	-0.875672	8.49268	0.00356578	0.0420742
	TOB1	1.05429	8.48256	0.00358567	0.0422845
	C19orf45	2.86047	8.47838	0.00359392	0.0423576
	STOML1	-1.14528	8.47623	0.00359818	0.0423761
	PADI2	0.940218	8.47549	0.00359962	0.0423761
	TMEM154	-1.02	8.47408	0.00360243	0.0423848
	ZBTB7B	0.930889	8.47143	0.00360767	0.0424222
	TMEM150C	2.2082	8.4629	0.00362463	0.0425971
	LOC90110	1.59512	8.45201	0.0036464	0.0428103
	LDHD	1.81264	8.45076	0.00364891	0.0428103
	VSIG2	1.50055	8.45018	0.00365007	0.0428103
	GLCE	0.795722	8.44967	0.00365111	0.0428103
	NDUFA9	-0.764467	8.44367	0.00366315	0.0429271
	LRRC41	0.761603	8.44162	0.0036673	0.0429511
	SAAL1	-1.07604	8.43987	0.00367082	0.0429678
	ITPRIPL1	-1.38513	8.43552	0.00367963	0.0430253
	CATSPER1	-2.06533	8.43537	0.00367992	0.0430253
	ACVR2A	1.02833	8.43213	0.00368648	0.0430775
	FAM182B	2.44717	8.42884	0.00369316	0.043131
	SPPL2B	0.910296	8.4214	0.00370831	0.0432447
	DACT1	-2.18864	8.42084	0.00370944	0.0432447
	LSM3	-0.84178	8.42073	0.00370966	0.0432447
	C1QTNF3	1.99069	8.41992	0.00371132	0.0432447
	PITRM1	-0.781841	8.41619	0.00371894	0.0433089
	ALAD	0.824636	8.41007	0.00373148	0.043416
	PAR5	-4.75976	8.40964	0.00373237	0.043416
	MRC1	-0.850281	8.40555	0.00374078	0.0434892
	MAP1LC3A	1.47731	8.40434	0.00374326	0.0434934
	CDT1	-0.794271	8.40128	0.00374957	0.0435421
	CMTM7	-0.919648	8.39676	0.00375891	0.0436258
	UTP6	-0.773582	8.39132	0.00377018	0.0437126
	AURKB	-0.905032	8.39109	0.00377064	0.0437126
	CABC1	0.846603	8.38918	0.00377462	0.0437331
	AGXT2L2	1.15971	8.3877	0.00377769	0.0437331
	CDCA2	-0.992994	8.38717	0.0037788	0.0437331
	PLD3	0.845047	8.38211	0.00378933	0.0438303
	KDM6B	0.817673	8.3746	0.00380501	0.0439868
	PDE4DIP	0.777364	8.37202	0.00381041	0.0440022
	PLXNB1	0.8094	8.37192	0.00381063	0.0440022
	ENPP2	1.71826	8.36356	0.00382819	0.0441802
	LOC90246	1.89712	8.353	0.00385051	0.0443738
	NKX1-2	-1.79465	8.35214	0.00385233	0.0443738
	SNORD116-28	-4.7481	8.35169	0.00385329	0.0443738
	RPS6KA6	1.0577	8.35116	0.00385441	0.0443738
	ADCY7	-0.813697	8.35027	0.00385631	0.0443738
	NEDD4	-0.76844	8.3495	0.00385793	0.0443738
	FAM193B	0.980229	8.34776	0.00386163	0.0443915
	IPO4	-0.843545	8.3406	0.00387688	0.0445418
	XBP1	0.790785	8.33246	0.00389429	0.0446918
	EIF4E3	1.00523	8.33246	0.00389429	0.0446918
	ANGPTL4	-1.99651	8.31838	0.00392459	0.0449975
	FAM174B	2.58891	8.31727	0.00392699	0.0449975
	GADD45GIP1	-0.763828	8.31703	0.0039275	0.0449975
	2018-09-01	2.58708	8.31024	0.00394222	0.045141
	SNCB	-3.729	8.29987	0.0039648	0.0453501
	NCAPH	-0.789923	8.29981	0.00396492	0.0453501
	TNC	-1.29963	8.29881	0.00396711	0.0453501
	ITGB1BP1	-0.758523	8.29634	0.00397251	0.0453866
	BYSL	-0.75331	8.29415	0.00397729	0.0454159
	CHKB-CPT1B	0.973764	8.29119	0.00398378	0.0454647
	ANGPTL2	0.780419	8.28925	0.00398805	0.0454881
	CNOT6L	1.04708	8.28533	0.00399667	0.0455611
	GPNMB	0.967304	8.28125	0.00400565	0.0456381
	FOXD4L3	2.92019	8.27864	0.00401141	0.0456785
	USP28	0.768438	8.27695	0.00401516	0.0456958
	CRYM	4.70303	8.27483	0.00401984	0.0457237
	IGFALS	2.31195	8.26942	0.00403185	0.0458349
	GTF2IP1	1.06311	8.26077	0.00405109	0.0460281
	C12orf57	0.873669	8.25907	0.00405488	0.0460458
	NEURL1B	0.885578	8.24913	0.00407714	0.046273
	NINJ2	1.47465	8.24167	0.00409394	0.0464379
	CRISP3	-2.37472	8.22865	0.00412342	0.0467466
	BRI3BP	-0.830686	8.22528	0.00413109	0.0467925
	DNTTIP1	-0.784317	8.22486	0.00413204	0.0467925
	TTC39C	0.955338	8.22144	0.00413983	0.0468549
	FAM8A1	1.0966	8.22038	0.00414224	0.0468564
	C2orf68	0.743279	8.21677	0.0041505	0.046924
	HSPB1	0.896479	8.21337	0.00415829	0.0469627
	STAT5A	-1.03598	8.21328	0.0041585	0.0469627
	GPR1	1.56476	8.20807	0.00417046	0.0470719
	STX11	-1.77488	8.20515	0.00417717	0.0470832
	TTBK1	2.40684	8.20515	0.00417717	0.0470832
	HTR3A	-4.67212	8.20386	0.00418014	0.0470832
	SSB	-0.781273	8.20364	0.00418063	0.0470832
	RFC2	-0.761063	8.20107	0.00418657	0.0471242
	ZC3H15	-0.73948	8.18796	0.00421693	0.0474399
	KPNA7	-1.70011	8.18115	0.0042328	0.0475924
	LRRC59	-0.871535	8.1752	0.0042467	0.0477225
	FTSJ2	-0.800842	8.168	0.00426359	0.0478861
	FAM102B	0.959026	8.15905	0.00428467	0.0480966
	CA11	2.40408	8.15374	0.00429725	0.0482114
	CLIP2	0.901207	8.14982	0.00430653	0.0482892
	NOV	-0.798541	8.14643	0.00431461	0.0483533
	PRELID1	-0.738005	8.14425	0.00431979	0.048385
	BAI3	2.00964	8.13172	0.00434976	0.0486575
	H1FX	0.896453	8.13162	0.00434998	0.0486575
	PTPRS	0.840689	8.1311	0.00435123	0.0486575
	RRAS	-0.975317	8.1281	0.00435845	0.0487117
	CUEDC2	0.971087	8.12404	0.00436821	0.0487941
	NHLRC4	1.95564	8.11984	0.00437834	0.0488808
	TIPIN	-0.957897	8.1166	0.00438618	0.0489416
	AIM2	-1.54615	8.10899	0.00440463	0.0491208
	CHD7	-0.744708	8.10787	0.00440735	0.0491245
	CLDN23	-2.73606	8.106	0.0044119	0.0491485
	DDX47	-0.778363	8.0931	0.00444341	0.0494727
	IGBP1	0.740952	8.08675	0.004459	0.0496193
	KDM1B	-0.762016	8.08121	0.00447266	0.0497444
	RND1	-1.90894	8.07663	0.00448397	0.0498432
	SH3D19	0.729076	8.06147	0.00452164	0.0502348
	C5orf4	1.57429	8.05775	0.00453095	0.050288
	FAM176A	-1.26321	8.05739	0.00453183	0.050288
	OGT	0.93568	8.05661	0.00453378	0.050288
	C19orf77	1.4433	8.0537	0.00454107	0.0503416
	TANC2	-0.729491	8.04197	0.00457057	0.0506413
	SLC35E2	0.747108	8.04024	0.00457495	0.0506496
	DNAJC9	-0.779895	8.03972	0.00457625	0.0506496
	DMRTA2	0.865397	8.03627	0.00458498	0.0507189
	FBXL14	-0.730145	8.0346	0.00458921	0.0507383
	KYNU	-2.18997	8.03177	0.00459639	0.0507904
	LOC646471	1.90341	8.0278	0.00460648	0.0508744
	MAPKAPK3	-0.775248	8.0231	0.00461845	0.0509793
	IRGM	-4.63736	8.01937	0.00462797	0.0510568
	WRAP53	-0.874556	8.01441	0.00464065	0.0511692
	EXT1	-0.796384	7.9994	0.00467929	0.0515676
	CHORDC1	-0.780732	7.99717	0.00468504	0.0515835
	PHF21A	0.941237	7.9969	0.00468575	0.0515835
	C9orf70	2.67809	7.99524	0.00469005	0.0516031
	BLM	-0.862847	7.98934	0.00470535	0.0517438
	LOC441869	0.809213	7.98626	0.00471337	0.0518042
	PCDH7	0.752552	7.98431	0.00471845	0.0518156
	COLEC11	1.49779	7.98392	0.00471946	0.0518156
	FN3K	1.84529	7.98167	0.00472533	0.0518524
	LOC100131726	-3.76322	7.97432	0.00474456	0.0520356
	ITPKC	0.755059	7.969	0.00475851	0.052135
	ANKLE1	-1.04265	7.96882	0.00475899	0.052135
	PLEKHM1	0.725596	7.96797	0.00476124	0.052135
	COL17A1	1.33356	7.96556	0.00476759	0.0521636
	MFSD6	0.729099	7.96504	0.00476894	0.0521636
	NLRC3	2.19688	7.95626	0.00479213	0.0523894
	C20orf117	0.752672	7.94595	0.00481951	0.0526178
	LOC338799	1.61924	7.9458	0.0048199	0.0526178
	SLC6A14	2.86397	7.9455	0.00482072	0.0526178
	GRIN1	1.28476	7.94394	0.00482488	0.0526353
	SKA3	-1.05492	7.93727	0.00484269	0.0528016
	ETV7	-3.51774	7.93071	0.00486027	0.0529605
	DSTYK	0.771395	7.92991	0.00486243	0.0529605
	ABLIM1	1.10793	7.92798	0.0048676	0.0529887
	LBXCOR1	2.16765	7.9207	0.00488724	0.0531743
	C5orf24	0.744686	7.91931	0.00489099	0.053187
	HEATR2	-0.738946	7.9172	0.0048967	0.0531971
	ATM	0.754113	7.91705	0.00489711	0.0531971
	FLJ12825	2.38481	7.91247	0.00490951	0.0533025
	ACSM3	2.19942	7.91155	0.00491201	0.0533025
	GMNN	-0.769384	7.90808	0.00492145	0.0533768
	TOMM5	-0.747964	7.9019	0.00493829	0.0535312
	LAMP3	0.835651	7.89675	0.00495236	0.0536554
	C3orf59	-0.938296	7.89393	0.00496009	0.0537107
	RAC3	1.04435	7.88924	0.00497296	0.0538197
	PSMB2	-0.836112	7.88836	0.00497539	0.0538197
	KIAA1429	-0.718087	7.88191	0.00499317	0.0539835
	ALDH3A2	0.893917	7.8794	0.00500011	0.0540301
	FOXC1	0.742458	7.86817	0.00503126	0.0543241
	ARHGAP17	-0.733447	7.86768	0.00503261	0.0543241
	MMP25	-1.99615	7.85822	0.00505901	0.0545804
	RB1CC1	0.778956	7.85628	0.00506446	0.0545914
	F8	1.05414	7.85513	0.00506768	0.0545914
	PSMG1	-0.739731	7.85501	0.005068	0.0545914
	LTC4S	2.68321	7.85073	0.00508003	0.0546922
	GALNT14	-0.748082	7.8482	0.00508714	0.0547039
	ERF	0.75294	7.84801	0.00508766	0.0547039
	TP53AIP1	1.44354	7.8475	0.00508911	0.0547039
	COL5A3	2.57528	7.84091	0.0051077	0.0548414
	SLC9A9	1.59415	7.84056	0.00510869	0.0548414
	EIF2AK3	0.781914	7.84012	0.00510991	0.0548414
	LOC151009	0.861896	7.8388	0.00511367	0.054853
	RHOC	-0.894783	7.83155	0.0051342	0.0550446
	AARSD1	-1.0935	7.82788	0.00514465	0.0551278
	RGS5	1.70725	7.82622	0.00514936	0.0551455
	ACSF2	1.12969	7.82541	0.00515168	0.0551455
	SMOC2	-4.62041	7.82231	0.00516051	0.0552113
	RNF148	-4.62039	7.82075	0.00516498	0.0552303
	LTBP4	1.22586	7.81473	0.00518222	0.0553431
	NEK6	-0.747696	7.81454	0.00518276	0.0553431
	GTPBP4	-0.745012	7.81424	0.00518361	0.0553431
	AIFM2	-0.732799	7.80781	0.0052021	0.0554923
	NCRNA00202	2.1999	7.8075	0.00520299	0.0554923
	PGM2	-0.737988	7.79484	0.00523956	0.0558533
	CCDC147	-2.053	7.79366	0.00524298	0.0558543
	ORC6L	-0.770556	7.79293	0.0052451	0.0558543
	GLRX2	-1.2525	7.79089	0.00525104	0.0558886
	LOC400931	2.15802	7.78851	0.00525795	0.0559331
	IL13RA2	2.27686	7.78284	0.00527448	0.0560799
	NCLN	-0.742253	7.78142	0.00527864	0.0560951
	PKD1L1	1.95406	7.77312	0.00530294	0.0563242
	MAK16	-0.761203	7.76991	0.00531236	0.0563951
	FBXL16	0.97083	7.76864	0.00531612	0.0564058
	TK1	-0.893269	7.76577	0.00532456	0.0564662
	LIMK1	-0.760582	7.76295	0.00533289	0.0565253
	HSF1	-0.739688	7.75746	0.00534911	0.056668
	FAH	-0.978884	7.75508	0.00535618	0.0567136
	ARPC1B	-0.895913	7.75351	0.00536082	0.0567336
	EFNB2	-0.765506	7.75199	0.00536535	0.0567522
	CROCC	0.991463	7.74838	0.00537607	0.0568363
	CTXN3	2.28967	7.74534	0.00538512	0.0569027
	CPA4	-1.14418	7.74378	0.00538977	0.0569225
	GUCY1B3	1.35562	7.74049	0.00539963	0.0569973
	WDR75	-0.72564	7.73515	0.00541562	0.0571367
	LOC283761	3.22358	7.73062	0.00542921	0.0572396
	GNG5	-0.724602	7.73004	0.00543095	0.0572396
	C6orf105	-1.92937	7.72768	0.00543807	0.057241
	SNORD116-20	-4.5882	7.72652	0.00544154	0.057241
	KLHL38	-4.5882	7.72638	0.00544198	0.057241
	DPH3	-0.873909	7.72629	0.00544223	0.057241
	MAP1A	-1.66643	7.72507	0.00544592	0.0572505
	RAB32	-0.744939	7.72394	0.00544935	0.0572572
	ACTA2	-1.65447	7.72134	0.00545719	0.0573102
	TEX15	-0.88362	7.71882	0.00546481	0.0573599
	DKK3	1.3432	7.71793	0.00546751	0.0573599
	SRRM3	1.63683	7.71202	0.00548544	0.0575187
	SRPX2	-0.958654	7.71038	0.00549043	0.0575416
	PPM1N	1.39361	7.70725	0.00549995	0.0575951
	UTP20	-0.766053	7.70686	0.00550114	0.0575951
	SPANXB2	-2.49743	7.69976	0.00552281	0.0577925
	PSME2	-0.749891	7.6985	0.00552667	0.0578034
	EPB41L3	-2.45046	7.69303	0.00554344	0.0579493
	2018-09-05	1.56275	7.6903	0.00555183	0.0580074
	KIAA0319L	0.712442	7.68682	0.00556255	0.0580899
	P2RY6	-1.76637	7.68465	0.00556925	0.0581084
	VILL	1.62921	7.68441	0.00556998	0.0581084
	BDH2	0.965439	7.68328	0.00557348	0.0581154
	STYXL1	-0.758136	7.67708	0.00559266	0.0582858
	FAM59A	0.732354	7.6737	0.00560316	0.0583425
	KBTBD7	0.951597	7.67349	0.00560379	0.0583425
	GJA3	-2.85596	7.67163	0.00560957	0.0583714
	MRPS15	-0.723239	7.67077	0.00561226	0.0583714
	ERGIC2	-0.729033	7.66922	0.00561707	0.058392
	SLC27A1	1.19024	7.66755	0.00562227	0.0584164
	CXCL6	-4.57098	7.66314	0.00563603	0.0585298
	RGS19	-0.889434	7.65315	0.00566733	0.0588251
	PGAP1	0.797874	7.6466	0.00568794	0.0590091
	DSC2	-0.955448	7.63781	0.00571574	0.0592676
	SIX1	0.774115	7.63361	0.00572906	0.0593757
	PLXNB3	0.759036	7.63141	0.00573604	0.0594181
	NFKBIE	-1.18915	7.62769	0.00574789	0.0594818
	MSR1	4.58021	7.62766	0.00574799	0.0594818
	PMM2	-0.744687	7.62183	0.00576658	0.0596282
	LOC441204	3.21271	7.62141	0.00576794	0.0596282
	PHB	-0.780342	7.60999	0.00580457	0.0599767
	SLC39A4	-1.54094	7.60346	0.00582565	0.0601642
	CCDC92	1.24847	7.60035	0.00583569	0.0602376
	RBP7	-2.04785	7.59822	0.00584259	0.0602786
	BBC3	1.11062	7.59672	0.00584746	0.0602984
	PLEKHA4	1.31377	7.59285	0.00586001	0.0603803
	GPR27	1.31367	7.59246	0.00586128	0.0603803
	PRKCH	0.740052	7.59044	0.00586786	0.0604178
	LTK	1.85789	7.58599	0.00588236	0.0605269
	SFXN4	-0.971402	7.58538	0.00588435	0.0605269
	C20orf197	2.16114	7.57458	0.00591973	0.0608603
	HK2	-0.824259	7.57198	0.00592826	0.0609175
[truncated: 1,992 more rows]
